# Supplementary material for: The Epidemiology of Post-Traumatic Stress Disorder after Disasters
Source: Oxford University Press journal article supplement (doi:10.1093/epirev/mxi003), 2005-06-15
Supplement: Galea_Web_Tables.pdf [file Galea_Web_Tables.pdf]

**WEB TABLE 1. Summary of diagnostic criteria for Post-traumatic stress disorder in Diagnostic and Statistical Manual III, III-R, and IV**

|                     | Diagnostic and Statistical Manual of Mental Disorders (Third Edition) (DSM-III) (12)                                                                | Diagnostic and Statistical Manual of Mental Disorders (Third Edition, Revised) (DSM-III-R) (42)                                                                                                                                                                                                                                | Diagnostic and Statistical Manual of Mental Disorders (Fourth Edition) (DSM-IV) (43)                                                                                                                     |
|---------------------|-----------------------------------------------------------------------------------------------------------------------------------------------------|--------------------------------------------------------------------------------------------------------------------------------------------------------------------------------------------------------------------------------------------------------------------------------------------------------------------------------|----------------------------------------------------------------------------------------------------------------------------------------------------------------------------------------------------------|
| Diagnostic Criteria | <b>Meet diagnostic criteria for PTSD: Criterion A; Criterion B (≥1 symptom); Criterion C (≥1 symptom); Criterion D (≥2 symptoms).</b>               | <b>Meet diagnostic criteria for PTSD: Criterion A; Criterion B (≥1 symptom); Criterion C (≥3 symptoms); Criterion D (≥2 symptoms); Criterion E.</b>                                                                                                                                                                            | <b>Meet diagnostic criteria for PTSD if: Criterion A (Symptom A and B); Criterion B (≥1 symptom); Criterion C (≥3 symptoms); Criterion D (≥2 symptoms); Criterion E; Criterion F.</b>                    |
| A                   | <b>Existence of a recognizable stressor that would evoke significant symptoms of distress in almost anyone.</b>                                     | <b>The person has experienced an event that is outside the range of usual human experience and that would be markedly distressing to almost anyone.</b>                                                                                                                                                                        | <b>The person has been exposed to a traumatic event in which both of the following were present:</b>                                                                                                     |
| A(1)                | <b>Not applicable</b>                                                                                                                               | <b>Not applicable</b>                                                                                                                                                                                                                                                                                                          | <b>The person experienced, witnessed, or was confronted with an event or events that involved actual or threatened death or serious injury, or a threat to the physical integrity of self or others.</b> |
| A(1)                | <b>Not applicable</b>                                                                                                                               | <b>Not applicable</b>                                                                                                                                                                                                                                                                                                          | <b>The person's response involved intense fear, helplessness, or horror. Note: In children, this may be expressed instead by disorganized or agitated behavior.</b>                                      |
| B                   | <b>Re-experiencing of the trauma as evidences by at least of the following ways:</b>                                                                | <b>The traumatic event is persistently reexperienced in at least one of the following ways:</b>                                                                                                                                                                                                                                | <b>Same as DSM-III-R.</b>                                                                                                                                                                                |
| B(1)                | <b>Recurrent and intrusive of an event.</b>                                                                                                         | <b>Recurrent and intrusive distressing recollections of the event, including images, thoughts, or perceptions.</b>                                                                                                                                                                                                             | <b>Same as DSM-III-R.</b>                                                                                                                                                                                |
| B(2)                | <b>Recurrent dreams of the event.</b>                                                                                                               | <b>Recurrent distressing dreams of the event.</b>                                                                                                                                                                                                                                                                              | <b>Same as DSM-III-R.</b>                                                                                                                                                                                |
| B(3)                | <b>Sudden acting or feeling as if the traumatic event were reoccurring, because of an association with an environmental or ideational stimulus.</b> | <b>Sudden acting or feeling as if the traumatic event were reoccurring, (includes a sense of reliving the experience, illusions, hallucinations, and dissociative flashback episodes, including those that occur on awakening or when intoxicated) because of an association with an environmental or ideational stimulus.</b> | <b>Same as DSM-III-R.</b>                                                                                                                                                                                |
| B(4)                | <b>Not applicable</b>                                                                                                                               | <b>Intense psychological distress at exposure to internal or external cues that symbolize or resemble an aspect of the traumatic event.</b>                                                                                                                                                                                    | <b>Same as DSM-III-R.</b>                                                                                                                                                                                |

|      |                                                                                                                                                           |                                                                                                                                                                                     |                                                                                                                                                         |
|------|-----------------------------------------------------------------------------------------------------------------------------------------------------------|-------------------------------------------------------------------------------------------------------------------------------------------------------------------------------------|---------------------------------------------------------------------------------------------------------------------------------------------------------|
| B(5) | Not applicable                                                                                                                                            | Not applicable                                                                                                                                                                      | Intense psychological distress at exposure to internal or external cues that symbolize or resemble an aspect of the traumatic event. Same as DSM-III-R. |
| C    | Numbing of responsiveness to or reduced involvement with external world, beginning some time after the trauma, as shown by at least one of the following: | Persistent avoidance of stimuli associated with the trauma and numbing of general responsiveness (not present before the trauma), as indicated by three (or more) of the following: |                                                                                                                                                         |
| C(1) | Markedly diminished interest in one or more significant activities.                                                                                       | Efforts to avoid thoughts or feelings associated with the trauma.                                                                                                                   | Efforts to avoid thoughts, feelings, or conversations associated with the trauma.                                                                       |
| C(2) | Feeling of detachment or estrangement from others.                                                                                                        | Efforts to avoid activities or situations that arouse recollections of the trauma.                                                                                                  | Efforts to avoid activities, places, or people that arouse recollections of the trauma.                                                                 |
| C(3) | Constricted affect.                                                                                                                                       | Inability to recall an important aspect of the trauma (psychogenic amnesia).                                                                                                        | Same as DSM-III-R.                                                                                                                                      |
| C(4) | Not applicable                                                                                                                                            | Markedly diminished interest of participation in significant activities.                                                                                                            | Same as DSM-III-R.                                                                                                                                      |
| C(5) | Not applicable                                                                                                                                            | Feeling of detachment or estrangement from others.                                                                                                                                  | Same as DSM-III-R.                                                                                                                                      |
| C(6) | Not applicable                                                                                                                                            | Restricted range of affect (e.g., unable to have loving feelings).                                                                                                                  | Same as DSM-III-R.                                                                                                                                      |
| C(7) | Not applicable                                                                                                                                            | Sense of a foreshortened future (e.g., does not expect to have a career, marriage, children, or a normal life span).                                                                | Same as DSM-III-R.                                                                                                                                      |
| D    | At least two of the following symptoms that were not present before the trauma:                                                                           | Persistent symptoms of increased arousal (not present before the trauma), as indicated by two (or more) of the following:                                                           | Same as DSM-III-R.                                                                                                                                      |
| D(1) | Hyperalertness or exaggerated startle response.                                                                                                           | Difficulty falling or staying asleep.                                                                                                                                               | Same as DSM-III-R.                                                                                                                                      |
| D(2) | Sleep disturbance.                                                                                                                                        | Irritability or outbursts of anger.                                                                                                                                                 | Same as DSM-III-R.                                                                                                                                      |
| D(3) | Guilt about surviving when others have not, or about behavior required for survival.                                                                      | Difficulty concentrating.                                                                                                                                                           | Same as DSM-III-R.                                                                                                                                      |
| D(4) | Memory impairment or trouble concentrating.                                                                                                               | Hypervigilance.                                                                                                                                                                     | Same as DSM-III-R.                                                                                                                                      |
| D(5) | Avoidance of activities that arouse recollection of the traumatic event.                                                                                  | Exaggerated startle response.                                                                                                                                                       | Same as DSM-III-R.                                                                                                                                      |
| D(6) | Intensification of symptoms by exposure to events that symbolize or resemble the traumatic event.                                                         | Physiologic reactivity upon exposure to events that symbolize or resemble an aspect of the traumatic event (e.g., a woman who                                                       | Not applicable                                                                                                                                          |

|   |                |                                                                                                                                                                       |                                                                                                                              |
|---|----------------|-----------------------------------------------------------------------------------------------------------------------------------------------------------------------|------------------------------------------------------------------------------------------------------------------------------|
| E | Not applicable | was raped in an elevator breaks out in a sweat when entering any elevator).<br>Duration of the disturbance (symptoms in Criteria B, C, and D) is more than one month. | Same as DSM-III-R.                                                                                                           |
| F | Not applicable | Not applicable                                                                                                                                                        | The disturbance causes clinically significant distress or impairment in social, occupational, or other areas of functioning. |

\*Serious threat to one's life or physical integrity; serious threat or harm to one's children, spouse, or other close relatives and friends; sudden destruction of one's home or community; or seeing another person who has recently been, or is being, seriously injured or killed as the result of an accident or physical violence.

**WEB TABLE 2. Key studies assessing post-traumatic stress after human-made or technological disasters**

| Sample; N; (reference no.)                                                                                              | Timeframe*     | PTSD Measure                                                                                                         | Main Findings                                                                                                                                                                                                                                                                                                                                                                   |
|-------------------------------------------------------------------------------------------------------------------------|----------------|----------------------------------------------------------------------------------------------------------------------|---------------------------------------------------------------------------------------------------------------------------------------------------------------------------------------------------------------------------------------------------------------------------------------------------------------------------------------------------------------------------------|
| <i>1966 Aberfan Mining Disaster, South Wales—October 21, 1966</i>                                                       |                |                                                                                                                      |                                                                                                                                                                                                                                                                                                                                                                                 |
| Exposed survivors (n=41) and unexposed matched controls (n=72); N=113; (62)**                                           | 33 years       | Composite International Diagnostic Interview and the Impact of Events Scale                                          | <i>Prevalence of PTSD since the disaster:</i> 46% of survivors compared to 20% of controls (OR± = 3.38); <i>Prevalence of current PTSD at 33 years (scoring ≥35 on IES):</i> 29% of survivors                                                                                                                                                                                   |
| <i>1972 Buffalo Creek Dam Collapse, West Virginia—February 26, 1972</i>                                                 |                |                                                                                                                      |                                                                                                                                                                                                                                                                                                                                                                                 |
| Children (ages 2-15) exposed to the disaster; N=179; (95)**                                                             | 2 years        | Clinical evaluations retrospectively examined using DSM-III-R criteria                                               | <i>Prevalence of PTSD:</i> 37%; <i>Correlates of PTSD symptoms:</i> life threat, female gender, mother's overall severity, irritable family atmosphere, depressed family atmosphere                                                                                                                                                                                             |
| Adults exposed to the disaster; N=193; (75)**                                                                           | 14 years       | Modified Structured Clinical Interview for DSM-III; caseness required at least 2 criteria C and 1 criteria D symptom | <i>Prevalence of PTSD:</i> 59.4% anytime after incident, 25.0% current at 14 years; <i>Correlates of PTSD prevalence at 14 years:</i> blocked during escape from flood waters, being injured, exposure to the elements for a long period, losing a household member                                                                                                             |
| Adults exposed to the disaster; N=120 at 14 years; (125)†                                                               | 2 and 14 years | Structured Clinical Interview for DSM-III modified to address most DSM-III-R criteria                                | <i>Correlates of persistent PTSD:</i> blocked while trying to escape flood waters, exposure to elements directly after flood, death in household; <i>Course:</i> prevalence of disaster-related PTSD decreased from 44% at 2 years to 28% at 14 years; 17% of the sample had persistent PTSD, 28% recovered, 44% did not have PTSD at 2 or 14 years, and 11% were delayed cases |
| Adults exposed to the disaster as children; N=99; (126)**                                                               | 17 years       | Structured Clinical Interview for DSM-III-R—Non-patient version, with the PTSD section added                         | <i>Prevalence of disaster-related PTSD:</i> 32% anytime after incident, 7% current at 17 years; <i>Correlates of PTSD symptoms:</i> injury, loss of pets                                                                                                                                                                                                                        |
| <i>1979 Three Mile Island Nuclear Accident—March 1979</i>                                                               |                |                                                                                                                      |                                                                                                                                                                                                                                                                                                                                                                                 |
| Exposed residents and unexposed controls; N=122; (39)**                                                                 | 58 months      | Impact of Events Scale                                                                                               | <i>Correlates of PTSD symptoms:</i> being in exposed group, higher levels of chronic stress                                                                                                                                                                                                                                                                                     |
| <i>1980 Alexander L. Kielland Oil Rig Disaster, North Sea—March 27, 1980</i>                                            |                |                                                                                                                      |                                                                                                                                                                                                                                                                                                                                                                                 |
| Exposed professional and non-professional rescue workers; N=134; (83)**                                                 | 9 months       | Impact of Events Scale                                                                                               | <i>Prevalence of high levels of PTSD severity:</i> 15% on intrusion scale, 13% on avoidance scale                                                                                                                                                                                                                                                                               |
| <i>1983 Apartment Building Explosion, Greenville, North Carolina—March 2, 1983</i>                                      |                |                                                                                                                      |                                                                                                                                                                                                                                                                                                                                                                                 |
| Rescue, fire, and medical personnel involved in rescue and treatment on-site (n=53) or at hospital (n=26); N=79; (80)** | 5 months       | Caseness required at least 1 reexperiencing, 1 avoidance, and 2 arousal symptoms                                     | <i>Prevalence of PTSD:</i> 13.9%; <i>Correlates of PTSD symptoms:</i> working on-site (vs. at hospital)                                                                                                                                                                                                                                                                         |
| <i>1984 School Playground Sniper Attack, Los Angeles—February 24, 1984</i>                                              |                |                                                                                                                      |                                                                                                                                                                                                                                                                                                                                                                                 |
| Children from the school directly or indirectly exposed; N=159; (106)**                                                 | 1 month        | Revised children's version of the PTSD Reaction Index,                                                               | <i>Prevalence of moderate to severe PTSD symptomatology:</i> 38.4%; <i>Correlates of high levels of PTSD severity:</i> proximity to shooting, knowledge of victim                                                                                                                                                                                                               |

|                                                                                                                                                 |                                  |                                                                                                                                                            |                                                                                                                                                                                                                                                                                                                                    |
|-------------------------------------------------------------------------------------------------------------------------------------------------|----------------------------------|------------------------------------------------------------------------------------------------------------------------------------------------------------|------------------------------------------------------------------------------------------------------------------------------------------------------------------------------------------------------------------------------------------------------------------------------------------------------------------------------------|
| Directly exposed and unexposed children from the Los Angeles school district; N=100; (106)†                                                     | 1 and 14 months                  | based on DMS-III criteria<br>Revised children's version of the PTSD Reaction Index, based on DMS-III criteria                                              | <i>Correlates of high levels of PTSD symptomatology at 14 months:</i> exposure, severity of child's baseline reaction, acquaintance with deceased (among unexposed), guilt feelings (among unexposed); <i>Course:</i> 74% of exposed children continued to report symptoms at 14 months compared to only 19% of unexposed children |
| Male college basketball players on board the aircraft; N=30; (136)†                                                                             | 12 days; 2, 5, 10, and 12 months | <i>1984 Airplane Crash Landing, Alabama—Late 1984</i><br>PTSD diagnosed using a structured interview based on DSM-III criteria                             | <i>Course:</i> PTSD prevalence declined from 54% at 12 days to 10-15% at 12 months                                                                                                                                                                                                                                                 |
| Exposed survivors (n=306) and unexposed controls (n=83); N=389; (124)**                                                                         | 7 years                          | <i>1985 Bus-Train Collision, Israel—June 11, 1985</i><br>PTSD Inventory, based on DSM-III-R criteria                                                       | <i>Correlates of PTSD symptoms:</i> being highly exposed                                                                                                                                                                                                                                                                           |
| Population samples from Gomel (n=1617) and Tver (n=1427); N=3044; (91)**                                                                        | 6.5 years                        | <i>1986 Chernobyl Nuclear Reactor Accident, Ukraine—April 26, 1986</i><br>12-item version of the General Health Questionnaire, based on DSM-III-R criteria | <i>Prevalence of PTSD:</i> prevalence was 2.4% in Gomel (near the accident site) compared to 0.4% in Tver (500 miles away)                                                                                                                                                                                                         |
| Male workers who participated in decontamination; N=71; (85)**                                                                                  | 6-7 years                        | PTSD diagnosed according to DSM-III-R criteria                                                                                                             | <i>Prevalence of PTSD:</i> 20% diagnosed with PTSD, 22% were at risk, and 58% were at no risk or mild risk for PTSD                                                                                                                                                                                                                |
| Immigrants from the Former Soviet Union to Israel from variably exposed and unexposed areas; N=699; (128)**                                     | 8 years                          | Impact of Events Scale                                                                                                                                     | <i>Correlates of PTSD symptoms:</i> being in high exposure group, number of stressful life events                                                                                                                                                                                                                                  |
| Survivors who migrated to the US from the general and clinical populations of Russian immigrants in the New York tri-state area; N=261; (103)** | 15 years                         | Revised Civilian Mississippi PTSD Scale                                                                                                                    | <i>Correlates of PTSD symptoms:</i> being in the clinical subgroup, older age, proximity to disaster, having left the Former Soviet Union (FSU) for environmental reasons, having left the FSU because of discrimination                                                                                                           |
| Survivors (n=47) and relatives of victims; (n=28); N=75; (74)**                                                                                 | Within 2 years                   | <i>1987 Herald of Free Enterprise Car Ferry Disaster, Belgium—March 6, 1987</i><br>PTSD diagnosed according to DSM-III-R criteria                          | <i>Prevalence of PTSD:</i> 36%; <i>Correlates of PTSD prevalence:</i> being in non-bereaved group                                                                                                                                                                                                                                  |
| Adult survivors; N=73; (129)**                                                                                                                  | 30 months                        | Impact of Events Scale                                                                                                                                     | <i>Correlates of intrusive symptoms:</i> greater perception of helplessness, bereavement; <i>Correlates of avoidance symptoms:</i> crisis support                                                                                                                                                                                  |
| Adult survivors; N=73 at 3 years, 37 at 5 years; (112)†                                                                                         | 3 and 5 years                    | Impact of Events Scale                                                                                                                                     | <i>Correlates of intrusive scores at 5 years:</i> intrusion scores at 3 years; <i>Correlates of avoidance symptom scores at 5 years:</i> negative attitudes at 3 years, avoidance scores at 3 years                                                                                                                                |

|                                                                                                                   |                         |                                                                                                                                                                       |                                                                                                                                                                                                                                                                                                                                                           |
|-------------------------------------------------------------------------------------------------------------------|-------------------------|-----------------------------------------------------------------------------------------------------------------------------------------------------------------------|-----------------------------------------------------------------------------------------------------------------------------------------------------------------------------------------------------------------------------------------------------------------------------------------------------------------------------------------------------------|
| Adult survivors; N=73 at 3 years, 37 at 6 years; (121)†                                                           | 3 and 6 years           | Impact of Events Scale                                                                                                                                                | <i>Correlates of intrusive symptoms at 6 years:</i> intrusion scores at 3 years; <i>Correlates of avoidance symptoms at 6 years:</i> less crisis support, avoidance scores at 3 years; <i>Course:</i> intrusive symptoms declined significantly between 3 and 6 years                                                                                     |
| Hotel employees who were on-site (n=17) or off-site (n=29); N=46; (72)**                                          | 4-6 weeks               | <i>1987 Jet Fighter Crash into Ramada Inn, Indianapolis—October 20, 1987</i><br>Diagnostic Interview<br>Schedule/Disaster<br>Supplement, based on<br>DSM-III criteria | <i>Prevalence of PTSD:</i> 22% among all employees, 29% among those who were on-site, 17% among those who were off-site                                                                                                                                                                                                                                   |
| Injured patients from a hospital and a primary care center; N=66; (104)**                                         | 10 days                 | <i>1987 Train Collision Accident, Lerum, Sweden—November 16, 1987</i><br>Avoidance and intrusion<br>symptoms                                                          | <i>Correlates of avoidance symptoms:</i> female gender, perception of threat to life; <i>Correlates of intrusion symptoms:</i> perception of threat to life                                                                                                                                                                                               |
| Directly exposed persons, including passengers and emergency medical personnel; N=50; (90)**                      | 1-12 months             | <i>1987 King's Cross Underground Railway Fire, London—November 18, 1987</i><br>Impact of Events Scale                                                                 | <i>Correlates of PTSD symptoms:</i> severe exposure to the disaster                                                                                                                                                                                                                                                                                       |
| School personnel directly or indirectly exposed; N=24; (107)**                                                    | 6 months                | <i>1988 School Shooting, Winnetka, Illinois—May 20, 1988</i><br>20-item Reaction Index-Adult<br>Version                                                               | <i>Correlates of PTSD symptoms:</i> guilt and resentment, insecurity, psychasthenia                                                                                                                                                                                                                                                                       |
| Public safety, medical, and mental health emergency services workers who responded to the shooting; N=140; (61)** | 6 months                | Impact of Events Scale                                                                                                                                                | <i>Correlates of current intrusion and avoidance symptoms:</i> perceived qualitative work load; <i>Course:</i> intrusion and avoidance symptoms decreased significantly over follow-up for all groups of emergency service workers                                                                                                                        |
| Children (n=64) and parents/school personnel (n=66) directly or indirectly exposed; N=130; (101)**                | 8-14 months             | 20-item Reaction Index<br>modified to reflect DSM-III-<br>R criteria                                                                                                  | <i>Prevalence of PTSD:</i> 3% among adults, 8% among children; <i>Correlates of PTSD among adults:</i> guilt, fear that perpetrator was still loose that day; <i>Correlates of PTSD among children:</i> guilt, thought they would be shot, physical symptoms, more visits to school nurse, recklessness, fears                                            |
| Police officers who searched for and identified human remains; N=48 at 3 months, 25 at 3 years; (79)†             | 3 months and<br>3 years | <i>1988 Piper Alpha Oil Rig Disaster—July 6, 1988</i><br>Impact of Events Scale                                                                                       | <i>Course:</i> total posttraumatic symptom scores decreased significantly between 3 months and 3 years                                                                                                                                                                                                                                                    |
| Survivors; N=33; (73)**                                                                                           | 10 years                | Clinician Administered PTSD<br>Scale for DSM-IV, Current<br>and Lifetime Diagnostic<br>Version                                                                        | <i>Prevalence of PTSD:</i> 73% acute diagnosis, 21% current at 10 years; <i>Correlates of current PTSD prevalence at 10 years:</i> impairment in social and occupational functioning; <i>Correlates of PTSD symptoms:</i> sustained anger, chronic dissociative symptoms, saw death of and/or injury to colleagues, difficulty finding work post-disaster |
| Professional and volunteer emergency responders; N=43; (81)†                                                      | 1 and 13<br>months      | <i>1988 Fatal School Bus Accident, Norway—August 15, 1988</i><br>Impact of Events Scale                                                                               | <i>Prevalence of high levels of PTSD severity at 1 month:</i> 25% among voluntary workers compared 13% among professional helpers; <i>Correlates of PTSD symptoms scores at 1 month:</i> being in voluntary worker group (vs.                                                                                                                             |

|                                                                                                                                   |                        |                                                                                                                                                      |                                                                                                                                                                                                                                                                                                                                                                                                                                                                                                                                                                                       |
|-----------------------------------------------------------------------------------------------------------------------------------|------------------------|------------------------------------------------------------------------------------------------------------------------------------------------------|---------------------------------------------------------------------------------------------------------------------------------------------------------------------------------------------------------------------------------------------------------------------------------------------------------------------------------------------------------------------------------------------------------------------------------------------------------------------------------------------------------------------------------------------------------------------------------------|
| Adults from Stockholm whose child or spouse were among the bus passengers; N=36; (221)†                                           | 1, 3, and 5 years      | Impact of Events Scale                                                                                                                               | professional); <i>Course</i> : symptoms declined significantly between 1 and 13 months<br><i>Course of high intrusion scores</i> : 39% at 1 year, 22% at 3 years, 31% at 5 years;<br><i>Course of high avoidance scores</i> : 19% at 1 year, 19% at 3 years, 3% at 5 years                                                                                                                                                                                                                                                                                                            |
| <i>1988 Air Show Midair Collision, Ramstein Air Force Base, Germany—August 28, 1988</i>                                           |                        |                                                                                                                                                      |                                                                                                                                                                                                                                                                                                                                                                                                                                                                                                                                                                                       |
| Military medical health care who cared for victims; N=355; (82)†                                                                  | 6, 12, and 18 months   | Modified version of the Symptom Checklist-9R and the Impact of Events Scale; caseness required meeting DSM-III-R criteria and scoring >19 on the IES | <i>Correlates of PTSD prevalence</i> : less education, working with burn patients, stressful events in 6 months post-disaster; <i>Course</i> : prevalence decreased from 12.1% at 12 months to 7.3% at 18 months                                                                                                                                                                                                                                                                                                                                                                      |
| <i>1988 Jupiter Shipping Disaster, Greece—October 21, 1988</i>                                                                    |                        |                                                                                                                                                      |                                                                                                                                                                                                                                                                                                                                                                                                                                                                                                                                                                                       |
| Adolescent survivors (n=217) from 15 UK schools and unexposed friends or acquaintances (n=87) from the same schools; N=304; (77)† | 5 months and 5-8 years | Clinician Administered PTSD Scale; PTSD defined according to DSM-IV criteria                                                                         | <i>Incidence of PTSD during follow-up</i> : 51.5% of the survivors compared to 3.4% of unexposed controls; <i>Onset</i> : 90% of PTSD cases developed within 6 months; <i>Course</i> : 30% of survivors who developed PTSD recovered within a year of onset, 34% still had PTSD at follow-up; 26% of survivors had PTSD for over 5 years                                                                                                                                                                                                                                              |
| Survivors (ages 11-18) from 15 UK schools; N=217; (117)†                                                                          | 5 months and 5-8 years | Clinician Administered PTSD Scale; PTSD defined according to DSM-IV criteria                                                                         | <i>Correlates of PTSD incidence</i> : seeing blood during sinking (OR = 2.36), being trapped during sinking (OR = 3.73), thought of not escaping (OR = 1.18), fear or panic (OR = 1.54), anxious at baseline (OR = 1.15); <i>Correlates of longer PTSD duration (≥2 years)</i> : relationship difficulties (OR = 2.35), childhood illness (OR = 5.16), depression symptoms at baseline (OR = 1.08); <i>Correlates of PTSD severity among those with PTSD</i> : childhood separation anxiety, not receiving help and support in school after disaster, depression symptoms at baseline |
| British mothers of adolescent children that were directly involved; N=37; (63)†                                                   | 3 months and 6 years   | Posttraumatic Stress Symptom Scale, based on DSM-III-R criteria                                                                                      | <i>Course</i> : prevalence of PTSD was 35.1% at 3 months and 8.1% at 6 years                                                                                                                                                                                                                                                                                                                                                                                                                                                                                                          |
| <i>1988 Clapham Rail Accident, UK—December 12, 1988</i>                                                                           |                        |                                                                                                                                                      |                                                                                                                                                                                                                                                                                                                                                                                                                                                                                                                                                                                       |
| Survivors (n=187) and unexposed controls (n=104); N=291; (76)**                                                                   | 10-22 months           | Impact of Events Scale; caseness required a score ≥40                                                                                                | <i>Prevalence of medium to high levels of intrusive PTSD severity</i> : 37% among exposed vs. 21% among controls; <i>Prevalence of medium to high levels of avoidance PTSD severity</i> : 28% among exposed vs. 17% among controls; <i>Correlates of intrusive PTSD symptoms</i> : injury severity, feeling at risk of death; <i>Correlates of avoidance PTSD symptoms</i> : injury severity, feeling trapped, witnessing death                                                                                                                                                       |
| <i>1989 Kegworth Air Disaster, UK—January 8, 1989</i>                                                                             |                        |                                                                                                                                                      |                                                                                                                                                                                                                                                                                                                                                                                                                                                                                                                                                                                       |
| Survivors of the crash; N=68; (69)**                                                                                              | 6-12 months            | Diagnoses were made according to DSM-III-R criteria                                                                                                  | <i>Prevalence of PTSD</i> : 40%; <i>Correlates of PTSD prevalence</i> : younger age, seeing injured or dead passengers, lower injury severity, increased alcohol consumption                                                                                                                                                                                                                                                                                                                                                                                                          |

|                                                                                                                                                    |                                               |                                                                                                                                                  |                                                                                                                                                                                                                       |
|----------------------------------------------------------------------------------------------------------------------------------------------------|-----------------------------------------------|--------------------------------------------------------------------------------------------------------------------------------------------------|-----------------------------------------------------------------------------------------------------------------------------------------------------------------------------------------------------------------------|
| <i>1989 Exxon Valdez Oil Spill, Alaska—March 24, 1989</i>                                                                                          |                                               |                                                                                                                                                  |                                                                                                                                                                                                                       |
| Residents of 13 communities highly exposed (n=145), mildly exposed (n=167), or unexposed (n=281); N=593; (92)**                                    | 1 year                                        | Modified version of the Diagnostic Interview Schedule-Version 3, based on DSM-III-R criteria                                                     | <i>Prevalence of post-disaster PTSD: 9.4%; Correlates of PTSD prevalence: being in highly exposed group (OR = 2.63), female gender (OR = 2.20)</i>                                                                    |
| Commercial fishers from a community economically affected by the incident; N=125; (70)**                                                           | 6 years                                       | Crime Related Post Traumatic Stress Disorder subscale of the Symptom Checklist 90-Revised; caseness defined using a 0.89 cutoff score            | <i>Prevalence of PTSD: 34% among males, 40% among females; Correlates of PTSD prevalence: avoidance coping, changes in relationships with non-relatives, changes in physical health, investment without gain</i>      |
| <i>1989 Hillsborough Football Stadium Disaster, Sheffield, UK—April 15, 1989</i>                                                                   |                                               |                                                                                                                                                  |                                                                                                                                                                                                                       |
| Police officers involved in at least one distressing situation during the disaster; N=70; (87)**                                                   | 1-2 years                                     | PTSD assessed using a scale based on DSM-III-R criteria                                                                                          | <i>Prevalence of PTSD: 44.3% classified with severe symptom severity, 44.1% classified with moderate symptom severity; Correlates of PTSD symptoms: depressive symptoms after the incident, depersonalization</i>     |
| <i>1989 USS Iowa Gun Turret Explosion—April 19, 1989</i>                                                                                           |                                               |                                                                                                                                                  |                                                                                                                                                                                                                       |
| Directly exposed volunteer mortuary workers; N=54 at 1 month, 41 at 4 months, 44 at 13 months; (137)†                                              | 1, 4, and 13 months                           | Symptom Checklist-90-R, Impact of Events Scale, and 12 additional items; caseness required meeting DSM-III-R criteria and scoring >19 on the IES | <i>Course: PTSD prevalence decreased from 11% at 1 month to 10% at 4 months to 2% at 13 months after the incident</i>                                                                                                 |
| Directly exposed volunteer mortuary workers; N=54 at 1 month, 41 at 4 months, 44 at 13 months; (222)†                                              | 1, 4, and 13 months                           | Symptom Checklist-90-R, Impact of Events Scale, and 12 additional items                                                                          | <i>Correlates of post-disaster PTSD: identifying with the deceased as a friend ("it could have been my friend")</i>                                                                                                   |
| <i>1989 Bus Disaster, Israel—July 6, 1989</i>                                                                                                      |                                               |                                                                                                                                                  |                                                                                                                                                                                                                       |
| Survivors of the incident; N=12 at 2 days, 12 at 8-10 months; (41)†                                                                                | 2 days and 8-10 months                        | 17-item PTSD checklist based on DSM-III-R criteria                                                                                               | <i>Prevalence of PTSD at 8-10 months: 33%</i>                                                                                                                                                                         |
| <i>1989 Marchioness Riverboat Disaster, Thames River, UK—August 20, 1989</i>                                                                       |                                               |                                                                                                                                                  |                                                                                                                                                                                                                       |
| Adult survivors, 25 of whom were multiply bereaved; N=27; (223)**                                                                                  | 10 months                                     | Impact of Events Scale                                                                                                                           | <i>Prevalence of PTSD symptoms: mean IES score (46.37) was higher than the normal population estimate of 10 and the mean of 34 reported in a study of stress clinic attendees</i>                                     |
| <i>1989 Loma Prieta Earthquake, San Francisco Bay Area, California—October 17, 1989</i>                                                            |                                               |                                                                                                                                                  |                                                                                                                                                                                                                       |
| 154 emergency services exposed (from I-880 freeway collapse) and a control group of 213 from the San Francisco and San Diego areas; N=367; (109)** | 1.5 years for exposed; 3-4 years for controls | Mississippi Scale for Combat-related PTSD (M-PTSD), modified for civilian EMS worker use                                                         | <i>Correlates of PTSD prevalence: fewer years of EMS experience, less social support, lower levels of psychological adjustment, external locus of control, exposure, more peri-traumatic dissociative experiences</i> |
| <i>1989 Lockerbie Disaster, Scotland—December 21, 1989</i>                                                                                         |                                               |                                                                                                                                                  |                                                                                                                                                                                                                       |
| Adult residents of Lockerbie claiming                                                                                                              | 10-14 months                                  | Clinical examinations with                                                                                                                       | <i>Prevalence of PTSD: moderate to severe PTSD present in 44% of claimants;</i>                                                                                                                                       |



|                                                                                                                        |                                      |                                                                                             |                                                                                                                                                                                                                                                                                                                                                                                                            |
|------------------------------------------------------------------------------------------------------------------------|--------------------------------------|---------------------------------------------------------------------------------------------|------------------------------------------------------------------------------------------------------------------------------------------------------------------------------------------------------------------------------------------------------------------------------------------------------------------------------------------------------------------------------------------------------------|
| insurance compensation; N=66 (78)**                                                                                    |                                      | diagnosis according to DSM-III-R criteria                                                   | 73% of claimants had PTSD of any degree.                                                                                                                                                                                                                                                                                                                                                                   |
| Community sample of adults who claimed insurance compensation; N=25; (139)†                                            | 10-14 months an 3 years              | Clinical examinations with diagnosis according to DSM-III-R criteria                        | <i>Prevalence of PTSD</i> : prevalence decreased from 72% at 10-14 months to 48% at 3 years; <i>Course</i> : 28% remained free of PTSD throughout follow-up; 48% represented persistent cases; 24% of PTSD cases recovered                                                                                                                                                                                 |
| Elderly residents of Lockerbie; N=31 at 1 year, 19 at follow-up; (138)†                                                | 1 and 3 years                        | Clinical examinations with diagnosis according to DSM-III-R criteria                        | <i>Prevalence of PTSD</i> : Prevalence decreased from 74% at 1 year to 16% at 3 years                                                                                                                                                                                                                                                                                                                      |
| <i>1991 Toxic Chemical Railroad Spill, California—July 14, 1991</i>                                                    |                                      |                                                                                             |                                                                                                                                                                                                                                                                                                                                                                                                            |
| Exposed residents (n=295) of affected areas and unexposed controls (n=114); N=409; (108)**                             | 3-4 months                           | Impact of Events Scale; caseness determined using cutoff score of 46                        | <i>Prevalence of PTSD</i> : 14.9% among exposed, 11.4% among controls; <i>Correlates of PTSD prevalence</i> : exposure, tension, depression, anger, fatigue, confusion                                                                                                                                                                                                                                     |
| Exposed residents (n=350) of affected areas and unexposed controls (n=114); N=464; (58)**                              | 3-4 months                           | Minnesota Multiphasic Personality Inventory 2 PTSD subscale                                 | <i>Correlates of PTSD</i> : being in exposed group                                                                                                                                                                                                                                                                                                                                                         |
| <i>1991 Mass Shooting Episode, Killeen, Texas—October 16, 1991</i>                                                     |                                      |                                                                                             |                                                                                                                                                                                                                                                                                                                                                                                                            |
| Persons directly or indirectly exposed to the shooting; N=113; (71)**                                                  | 1 month                              | Diagnostic Interview Schedule/Disaster Supplement, based on DSM-III-R criteria              | <i>Prevalence of PTSD</i> : 28.6% in total sample (20.3% among men, 35.8% among women); <i>Correlates of PTSD prevalence</i> : any pre-disaster psychiatric disorder excluding PTSD (among women), post-disaster depression                                                                                                                                                                                |
| Persons directly or indirectly exposed to the shooting; N=136 at 6-8 weeks, 124 at 13-14 weeks; (66)†                  | 6-8 weeks and 13-14 months           | Diagnostic Interview Schedule/Disaster Supplement, based on DSM-III-R criteria              | <i>Onset</i> : 68% reported symptom onset the day of the incident, 22% the week after, and 11% later in the month; <i>Correlates of PTSD prevalence</i> : female gender, pre-disaster psychopathology (among women), pre-disaster depression, acute post-disaster psychiatric illness or depression; <i>Course of current PTSD</i> : prevalence decreased from 27.2% at 6-8 weeks to 17.7% at 13-14 months |
| Persons directly or indirectly exposed to the shooting; N=136 at 6-8 weeks, 124 at 13-14 weeks, 116 at 3 years; (110)† | 6-8 weeks, 13-14 months, and 3 years | Diagnostic Interview Schedule/Disaster Supplement, based on DSM-III-R criteria              | <i>Correlates of PTSD prevalence</i> : abandonment of control (at 6-8 weeks, 13-14 months, and 3 years), passive isolation (at 6-8 weeks); <i>Course of current PTSD</i> : 29% at 6-8 weeks, 17% at 13-14 months, 19% at 3 years                                                                                                                                                                           |
| Adults directly or indirectly exposed to the shooting; N=136 at 6-8 weeks, 116 at 3 years; (64)†                       | 6-8 weeks, 13-14 months, and 3 years | Diagnostic Interview Schedule/Disaster Supplement, based on DSM-III-R criteria              | <i>Correlates of chronic PTSD at 3 years post-disaster</i> : functional impairment, seeking mental health treatment at baseline; <i>Course of current disaster-related PTSD</i> : 26% at 6-8 weeks, 14% at 1 year, 18% at 3 years                                                                                                                                                                          |
| <i>1991 Imperial Foods Industrial Fire, Hamlet, North Carolina—September 1991</i>                                      |                                      |                                                                                             |                                                                                                                                                                                                                                                                                                                                                                                                            |
| Students from 2 schools in the affected community; N=1019; (134)**                                                     | 9 months                             | Self-Reported Post-Traumatic Symptomatology scale; caseness according to DSM-III-R criteria | <i>Prevalence of PTSD</i> : 11.9%; <i>Correlates of PTSD symptoms</i> : exposure to disaster, African-American ethnicity, female gender                                                                                                                                                                                                                                                                    |
| <i>1992 Los Angeles County Civil Disturbances—April 29, 1992</i>                                                       |                                      |                                                                                             |                                                                                                                                                                                                                                                                                                                                                                                                            |
| Household probability sample of                                                                                        | 6-8 months                           | National Women's Study                                                                      | <i>Prevalence of current (past 6 months) PTSD</i> : 4.1%; <i>Correlates of PTSD</i>                                                                                                                                                                                                                                                                                                                        |

|                                                                                                                                                         |                          |                                                                       |                                                                                                                                                                                                                                                                                                                                                                               |
|---------------------------------------------------------------------------------------------------------------------------------------------------------|--------------------------|-----------------------------------------------------------------------|-------------------------------------------------------------------------------------------------------------------------------------------------------------------------------------------------------------------------------------------------------------------------------------------------------------------------------------------------------------------------------|
| adults from L.A. County; N=1200; (65)**                                                                                                                 |                          | PTSD Module, based on DSM-III-R criteria                              | <i>prevalence</i> : lifetime traumatic events (OR = 1.50), past year stressful events (OR = 1.44), past year victimization (OR = 2.02), disturbance exposure (OR = 1.26)                                                                                                                                                                                                      |
| <i>1992 Courthouse Shooting, Missouri—May 5, 1992</i>                                                                                                   |                          |                                                                       |                                                                                                                                                                                                                                                                                                                                                                               |
| Courthouse employees and offices of exposed individuals; N=80 at 6-8 weeks, 77 at 1 and 3 years; (67)†                                                  | 6-8 weeks; 1 and 3 years | Diagnostic Interview Schedule/Disaster Supplement                     | <i>Prevalence of disaster related PTSD</i> : 5%; <i>Onset</i> : 6 of 8 cases reported symptom onset on the day of the incident; <i>Correlates of PTSD symptoms at 6-8 weeks</i> : older age, less than a college education, currently married; <i>Course</i> : 6 of 8 cases of PTSD were resolved by 3 years; symptoms decreased significantly between baseline and follow-up |
| <i>1992 Bijlmermeer Plane Crash, Netherlands—October 4, 1992</i>                                                                                        |                          |                                                                       |                                                                                                                                                                                                                                                                                                                                                                               |
| Adult disaster victims from the most severely damaged apartment blocks and adjacent buildings; N=136; (132)**                                           | 6 months                 | 17-item Structured Interview for PTSD, adapted for DSM-III-R criteria | <i>Prevalence of PTSD</i> : 26%; <i>Correlates of PTSD prevalence</i> : losing a loved one, suffering material damage or lost home, being at home during the incident                                                                                                                                                                                                         |
| <i>1993 World Trade Center Bombing—February 26, 1993</i>                                                                                                |                          |                                                                       |                                                                                                                                                                                                                                                                                                                                                                               |
| Exposed public school students at the World Trade Center during the explosion (N=22), and 27 unexposed controls; N=49; (60)†                            | 3 and 9 months           | Posttraumatic Stress Reaction Index                                   | <i>Correlates of PTSD symptoms</i> : being in exposed group; <i>Course</i> : prevalence of severe to very severe symptomatology among exposed children decreased from 27% at 3 months to 14% at 9 months                                                                                                                                                                      |
| <i>1993 Fire at the Branch Davidian Compound, Waco, Texas—April 19, 1993</i>                                                                            |                          |                                                                       |                                                                                                                                                                                                                                                                                                                                                                               |
| Exposed dentists (n=31) who performed postmortem identifications and unexposed control dentists (n=47); N=78; (120)**                                   | 6 months                 | Impact of Events Scale                                                | <i>Correlates of PTSD symptoms</i> : being in exposed group, duration of exposure to remains, younger age (among exposed), spouse and co-worker support (among exposed)                                                                                                                                                                                                       |
| <i>1993 Sivas Religious Uprisings, Turkey—July 2, 1993</i>                                                                                              |                          |                                                                       |                                                                                                                                                                                                                                                                                                                                                                               |
| Highly exposed fire survivors (n=27), moderately exposed violent protest survivors (n=34), and mildly exposed health professionals (n=18); N=79; (130)† | 1, 6, 12, and 18 months  | PTSD defined according to DSM-III-R criteria                          | <i>Prevalence of acute PTSD</i> : 20.3%; <i>Prevalence of chronic PTSD</i> : 12.7%, of which 1.3% resolved by 18 months and 11.4% persisted; <i>Prevalence of delayed-onset PTSD</i> : 16.5%, of which 11.5% were resolved by 18 months and 5.0% persisted; <i>Correlates of chronic PTSD</i> : extent of trauma                                                              |
| <i>1994 Brooklyn Bridge Shooting—March 1, 1994</i>                                                                                                      |                          |                                                                       |                                                                                                                                                                                                                                                                                                                                                                               |
| Hasidic students (ages 16-22) who survived a shooting attack on their van; N=11; (56)†                                                                  | 8 weeks and 10 months    | Posttraumatic Stress Disorder Symptom Scale, based on DSM-IV criteria | <i>Prevalence of PTSD</i> : 4 of 11 students (28%) had PTSD at 8 weeks; <i>Course</i> : At 10 months, all 4 students with PTSD at 8 weeks showed persistent symptoms of PTSD                                                                                                                                                                                                  |
| <i>1994 Crash of US Air Flight 427, Pennsylvania—September 8, 1994</i>                                                                                  |                          |                                                                       |                                                                                                                                                                                                                                                                                                                                                                               |
| 21 therapists who provided post-disaster counseling and 20 control                                                                                      | 4, 8, and 12 weeks       | Symptom checklist measuring 6 DSM-IV PTSD symptoms                    | <i>Course</i> : at 4 and 8 weeks, the exposed group reported significantly more PTSD symptoms than the controls; by 12 weeks, only symptoms of avoidance were                                                                                                                                                                                                                 |

|                                                                                                                                |              |                                                                                                                                                                                         |                                                                                                                                                                                                                                                                              |
|--------------------------------------------------------------------------------------------------------------------------------|--------------|-----------------------------------------------------------------------------------------------------------------------------------------------------------------------------------------|------------------------------------------------------------------------------------------------------------------------------------------------------------------------------------------------------------------------------------------------------------------------------|
| therapists; N=41; (86)†                                                                                                        |              |                                                                                                                                                                                         | more common among the exposed                                                                                                                                                                                                                                                |
| Exposed disaster workers involved in the body recovery process; N=41; (84)**                                                   | 6 months     | Caseness required meeting DSM criteria and reporting "high" symptom severity on the Impact of Events Scale<br><i>1994 m/s Estonia Car Ferry Disaster, Baltic Sea—September 27, 1994</i> | <i>Prevalence of PTSD: 4.9%; Correlates of PTSD prevalence:</i> Acute Stress Disorder in first week after incident                                                                                                                                                           |
| Adults survivors of the disaster; N=42; (111)**                                                                                | 3 months     | Post Traumatic Symptom Scale (using cutoff value of 20) and the Impact of Events Scale (using cutoff of 3)<br><i>1994 N149 Supertanker Explosion—October, 1994</i>                      | <i>Prevalence of PTSD: 64.3% using both instruments; Correlates of PTSD symptoms:</i> loss of a spouse, weaker coping abilities, symptoms of peri-traumatic dissociation                                                                                                     |
| Workers (257 males, 12 females) differentially exposed to the disaster; N=270; (105)**                                         | 6.5 months   | Impact of Events scale; caseness required scoring ≥19<br><i>1994 Plane Crash in Coventry, UK—December 21, 1994</i>                                                                      | <i>Prevalence of PTSD: 41%; Correlates of PTSD symptoms:</i> older age, experiencing accidents at the shipyard before the explosion, being in less exposed group, described families' reactions as "impressed", survivor guilt, less social support                          |
| Directly and indirectly exposed residents; N=82; (198)**                                                                       | 6 months     | 15-item Impact of Events Scale<br><i>1995 Oklahoma City Bombing—April 19, 1995</i>                                                                                                      | <i>Correlates of PTSD symptoms:</i> being in directly exposed group, not receiving professional help (among directly exposed), worrying about safety (among directly exposed), present feelings when heard planes flying over (among indirectly exposed)                     |
| Oklahoma City public school students; N=3218; (96)**                                                                           | 7 weeks      | Impact of Events Scale-Revised                                                                                                                                                          | <i>Correlates of PTSD symptoms:</i> higher proportion of bombing-related television viewing in month after attack, reporting a sibling or parent killed, female gender                                                                                                       |
| Students from 11 public middle schools in Oklahoma City; N=2381; (99)**                                                        | 7 weeks      | 22 items adapted from the Impact of Events Scale-Revised                                                                                                                                | <i>Correlates of PTSD symptoms:</i> television exposure (among students with no physical or emotional exposure)                                                                                                                                                              |
| Exposed adults from Oklahoma City (n=1010) and unexposed controls from Indianapolis (n=750); N=1760; (94)**                    | 3-4 months   | 6 questions about PTSD symptoms                                                                                                                                                         | <i>Prevalence of PTSD symptoms:</i> in Oklahoma City, 76.1% reported at least one PTSD symptom (compared to 62.7% in Indianapolis) and 43.1% reported at least 4 PTSD symptoms (compared to 32.1% in Indianapolis)                                                           |
| Adults from Oklahoma City seeking mental health assistance; N=85; (131)**                                                      | 6 months     | Impact of Events Scale-Revised                                                                                                                                                          | <i>Correlates of PTSD symptoms:</i> being injured, feeling nervous or afraid, perceived life endangerment, being upset by others' behaviors, reporting that counseling helped, reporting that work helped                                                                    |
| Exposed children who reported the death of a friend or acquaintance (n=27) and unexposed matched children (n=27); N=54; (97)** | 8-10 months  | 22 items adapted from the Impact of Events Scale-Revised                                                                                                                                | The mean PTSD symptom score for the group that lost a friend was significantly higher than for the group that lost an acquaintance; however, neither the group who lost a friend nor the group who lost an acquaintance scored significantly higher than the unexposed group |
| Adults survivors of the bombing                                                                                                | 6 months and | Diagnostic Interview                                                                                                                                                                    | <i>Prevalence of PTSD at 6 months: 34.3%; Onset:</i> Among PTSD cases, 74%                                                                                                                                                                                                   |

|                                                                                                |                        |                                                            |                                                                                                                                                                                                                                                                                                                                                                                                                                           |
|------------------------------------------------------------------------------------------------|------------------------|------------------------------------------------------------|-------------------------------------------------------------------------------------------------------------------------------------------------------------------------------------------------------------------------------------------------------------------------------------------------------------------------------------------------------------------------------------------------------------------------------------------|
| selected from a registry; N=182 at 6 months, 141 at 1 year; (10)†                              | 1 year                 | Schedule/Disaster Supplement, based on DSM-III-R criteria  | reported same day onset, 18% within the first week, and 4% within the first month; <i>Correlates of PTSD prevalence at baseline</i> : female gender, pre-disaster psychiatric disorder, injury, injury or death of family member or friend; <i>Course</i> : 89% of persons with PTSD since the bombing were still symptomatic at 6 months                                                                                                 |
| Adult Asian and Middle Eastern immigrants living in Oklahoma City; N=45; (133)**               | 1.5-2 years            | 21 Items from the Posttraumatic Stress Scale               | <i>Correlates of PTSD symptoms</i> : PTSD symptoms from prior trauma, older current age, younger age at time of prior trauma                                                                                                                                                                                                                                                                                                              |
| Sixth grade public school students from a community 100 miles from Oklahoma City; N=69; (98)** | 2 years                | 22 items adapted from the Impact of Events Scale-Revised   | <i>Prevalence of PTSD</i> : 44% using least stringent criteria, 4% using most stringent criteria; <i>Correlates of PTSD symptoms</i> : difficulty functioning, exposure to TV/radio coverage of bombing (current and in aftermath), proportion of reading devoted to bombing-related material (current and in aftermath), having a friend who knew someone injured or killed                                                              |
| Adult survivors of the bombing; N=494; (224)**                                                 | 1.5-3 years            | PTSD measured using DSM-IV criteria                        | <i>Prevalence of PTSD</i> : 4%                                                                                                                                                                                                                                                                                                                                                                                                            |
| Firefighters involved in rescue and recovery (n=181) and primary victims (n=88); N=269; (89)** | 34 months              | Diagnostic Interview Schedule                              | <i>Prevalence of PTSD</i> : prevalence among firefighters was lower than among primary victims (13% vs. 23%); <i>Correlates of PTSD prevalence among firefighters</i> : time spent at the bombing site, time spent in "the pit", pre-disaster PTSD diagnosis                                                                                                                                                                              |
| Firefighters involved in rescue and recovery; N=181; (122)**                                   | 34 months              | Diagnostic Interview Schedule for DSM-III-R                | <i>Correlates of PTSD prevalence</i> : functional impairment, less pride in job, less positive job satisfaction, reporting more negative effects of the bombing on job satisfaction, less likely to get along with their boss and coworkers, changes in relationships                                                                                                                                                                     |
| <i>1995 Elementary School Hostage Situation, Paris, France—December 3, 1995</i>                |                        |                                                            |                                                                                                                                                                                                                                                                                                                                                                                                                                           |
| Directly (taken hostage) and indirectly exposed children (ages 6-10); N=47; (102)†             | 2, 4, 7, and 18 months | Diagnoses using Kiddie-SADS-L according to DSM-IV criteria | <i>Course of PTSD among exposed</i> : 4% at 4 months, 12% at 7 months, 5% at 18 months; <i>Course of PTSD among indirectly exposed</i> : 10% at 4 months, 6% at 7 months, 0% at 18 months                                                                                                                                                                                                                                                 |
| <i>1996 Train Collision Disaster, UK—March 8, 1996</i>                                         |                        |                                                            |                                                                                                                                                                                                                                                                                                                                                                                                                                           |
| Adults residents of the surrounding community present during incident; N=49; (93)**            | 7 months               | Impact of Events Scale                                     | <i>Prevalence of high PTSD symptom severity</i> : 57%; <i>Correlates of PTSD symptoms</i> : awake watching TV, having refreshments, writing or entertaining friends at time of incident; heard train approaching, heard very loud "bang", or feeling vibration at time of impact; shocked and terrified feelings directly after incident; feeling anxious or worried, nervous when a train passed, angry about what happened at interview |
| Adult residents from households 30 to 100 feet from the crash; N=66; (170)**                   | 7 months               | Impact of Events Scale                                     | <i>Prevalence of high PTSD symptom severity</i> : 51%; <i>Correlates of intrusion and avoidance symptoms</i> : neuroticism                                                                                                                                                                                                                                                                                                                |
| <i>1996 TWA Flight 800 Crash, New York—July 17, 1996</i>                                       |                        |                                                            |                                                                                                                                                                                                                                                                                                                                                                                                                                           |
| Exposed Navy divers (n=66) who                                                                 | 3-6 months             | Impact of Events Scale                                     | <i>Prevalence of PTSD symptoms</i> : there were no significant differences between                                                                                                                                                                                                                                                                                                                                                        |

participated in recovery and unexposed divers (n=59); N=125; (225)\*\*

PTSD symptom scores when comparing exposed and unexposed divers

|                                                                                                     |                  |                                                                                                            |                                                                                                                                                                                                                                                        |
|-----------------------------------------------------------------------------------------------------|------------------|------------------------------------------------------------------------------------------------------------|--------------------------------------------------------------------------------------------------------------------------------------------------------------------------------------------------------------------------------------------------------|
| <i>1996 Ground Slump Industrial Disaster, Briey Region, France—October 14 and November 18, 1996</i> |                  |                                                                                                            |                                                                                                                                                                                                                                                        |
| Exposed, indirectly exposed, and unexposed children; N=127; (57)**                                  | 6-7 months       | Impact of Events Scale; caseness determined using cutoff score of 42                                       | <i>Correlates of PTSD symptoms:</i> being in exposed group (vs. indirectly or unexposed group), lower socioeconomic status, younger age, higher levels of parental distress                                                                            |
| <i>1996 Subway Bombing, Paris, France—December 1996</i>                                             |                  |                                                                                                            |                                                                                                                                                                                                                                                        |
| Victims of the bomb attack; N=32; (135)†                                                            | 6 and 32 months  | Questionnaire of Posttraumatic Stress and the Impact of Events Scale; caseness based on DSM-III-R criteria | <i>Correlates of higher PTSD symptoms at 32 months:</i> physical injuries, non-managerial employment position, psychometric drug use before the incident; <i>Course of current PTSD:</i> prevalence decreased from 39% at 6 months to 25% at 32 months |
| <i>1998 American Embassy Bombing, Nairobi, Kenya—August 7, 1998</i>                                 |                  |                                                                                                            |                                                                                                                                                                                                                                                        |
| Nairobi school children exposed to the bombing; N=562; (40)**                                       | 8-14 months      | 22-item Posttraumatic Stress Scale                                                                         | <i>Correlates of PTSD symptoms:</i> more severe peri-traumatic reaction, PTSD symptoms relating to other prior traumatic experiences                                                                                                                   |
| <i>1998 Omagh Bombing, Northern Ireland—August 15, 1998</i>                                         |                  |                                                                                                            |                                                                                                                                                                                                                                                        |
| Employees of the local health service; N=1064; (116)**                                              | 4 months         | Posttraumatic Stress Disorder Symptom Scale, based on DSM-III-R criteria                                   | <i>Correlates of PTSD symptoms:</i> involvement in the bombing, involvement in both a civilian and professional capacity, previous experiences of trauma, past emotional difficulties                                                                  |
| Doctors working in the aftermath of the bombing; N=17 at 4 and 17 months; (88)†                     | 4 and 17 months  | PTSD Symptom Scale, based on DSM-IV criteria                                                               | <i>Correlates of PTSD symptoms:</i> younger age; <i>Course:</i> prevalence of PTSD among doctors increased from 6% at 4 months to 12% at 17 months                                                                                                     |
| <i>1998 Swissair Flight 111 Airline Crash, Canada—September 2, 1998</i>                             |                  |                                                                                                            |                                                                                                                                                                                                                                                        |
| Recovery and instrumental volunteer responders; N=13; (114)**                                       | 3 years          | Modified PTSD Symptom Scale, based on DSM-IV criteria                                                      | <i>Prevalence of current PTSD at 4 months:</i> 46%; <i>Correlates of PTSD prevalence:</i> exposure to human remains; <i>Correlates of greater PTSD severity:</i> use of alcohol to cope, use of alcohol to forget                                      |
| Volunteer disaster workers; N=13; (113)**                                                           | 3 years          | Modified PTSD Symptom Scale, based on DSM-IV criteria                                                      | <i>Correlates of PTSD prevalence:</i> exposure to human remains, more time performing recovery, behavioral disengagement coping, restraint coping, alcohol-drug disengagement coping, suppression of competing activities coping                       |
| <i>2001 Train Collision Disaster, Belgium—March 27, 2001</i>                                        |                  |                                                                                                            |                                                                                                                                                                                                                                                        |
| Residents of adjacent town exposed to the train collision; N=29; (226)†                             | 1 and 3.5 months | Posttraumatic Symptom Scale; PTSD defined according to DSM-IV criteria                                     | <i>Course:</i> prevalence decreased from 28% at 1 month to 24% at 3.5 months                                                                                                                                                                           |
| <i>September 11, 2001 Terrorist Attacks, New York City and Washington, DC—September 11, 2001</i>    |                  |                                                                                                            |                                                                                                                                                                                                                                                        |
| African-American undergraduates; N=219; (28)**                                                      | 2-3 days         | Modified version of the PTSD Checklist-Civilian Version; caseness required scoring at least 50 out of 85   | <i>Prevalence of PTSD:</i> 5%; <i>Correlates of PTSD symptoms:</i> having parents not currently together, later college year                                                                                                                           |

|                                                                                                                                                   |                               |                                                                                                                                            |                                                                                                                                                                                                                                                                                                                                                                                                       |
|---------------------------------------------------------------------------------------------------------------------------------------------------|-------------------------------|--------------------------------------------------------------------------------------------------------------------------------------------|-------------------------------------------------------------------------------------------------------------------------------------------------------------------------------------------------------------------------------------------------------------------------------------------------------------------------------------------------------------------------------------------------------|
| Nationally representative sample; N=560 adults, 170 children; (31)**                                                                              | 3-5 days                      | For adults, 5 questions from the PTSD checklist; for children, 5 questions from the Diagnostic Interview Schedule for Children, Version 4; | <i>Prevalence of substantial stress reaction:</i> 44% among adults, 35% among children; <i>Correlates of PTSD symptoms among adults:</i> female gender, minority status, prior emotional or mental health problems, proximity to World Trade Center, northeast region residence, more hours of TV coverage viewed on day of attacks; <i>Correlates of PTSD symptoms among children:</i> female gender |
| Patients from 3 community-based outpatient psychiatric and primary care practices in Rhode Island; N=308; (23)**                                  | 2-3 weeks                     | Modified Posttraumatic Diagnostic Scale                                                                                                    | <i>Prevalence of PTSD:</i> 28%; <i>Correlates of PTSD prevalence:</i> psychiatric (vs. medical patient) (OR = 3.17), feeling that the attacks worsened preexisting condition, wanting to speak to clinician about attacks, scheduling appointment to talk about attacks                                                                                                                               |
| Random sample of Manhattan adults living south of 110 <sup>th</sup> street; N=988; (24)**                                                         | 5-8 weeks                     | National Women's Study PTSD questionnaire                                                                                                  | <i>Prevalence of PTSD:</i> 7.5%; <i>Correlates of PTSD prevalence:</i> Hispanic ethnicity (OR = 2.6), experiencing ≥2 stressors in the 12 months before Sept. 11 (OR = 5.5), panic attack (OR = 7.6), residence south of Canal St. (OR = 2.9), loss of possessions due to the attacks (OR = 5.6)                                                                                                      |
| Random sample of Manhattan adults living south of 110 <sup>th</sup> street; N=988; (29)**                                                         | 5-8 weeks                     | National Women's Study PTSD questionnaire                                                                                                  | <i>Correlates of PTSD prevalence:</i> after adjusting for potential confounders, the association between female gender and PTSD diminished from OR = 2.2 to OR = 1.2                                                                                                                                                                                                                                  |
| Manhattan adults living south of 110 <sup>th</sup> street; N=988; (123)**                                                                         | 5-8 weeks                     | National Women's Study PTSD questionnaire                                                                                                  | <i>Correlates of PTSD prevalence:</i> reporting seeing people falling from the World Trade Center more than 7 times on television (OR = 3.1)                                                                                                                                                                                                                                                          |
| Nationally representative adult sample with oversample of several metropolitan areas; N=2273; (30)**                                              | 1-2 months                    | Specific stressor version of PTSD Checklist; caseness required scoring ≥50                                                                 | <i>Prevalence of PTSD:</i> 11.2% among NYC residents, 4.3% nationally; <i>Correlates of PTSD prevalence:</i> being in NYC metro area on Sept. 11, TV coverage viewed per day, graphic Sept. 11 events viewed on TV; <i>Correlates of PTSD symptoms (NYC sample only):</i> younger age, female gender, being in the WTC on Sept. 11, hours of TV coverage viewed per day                               |
| Sample of Vietnamese, Cambodian, Laotian, Bosnian, and Somali refugees with PTSD from a US psychiatric program; N=129; (27)**                     | Within 2 months               | Not reported                                                                                                                               | Refugees with PTSD showed a strong reaction to the events of Sept. 11, including significant increases in the frequency of recurrent nightmares and intrusive memories, suggesting that the events of Sept. 11 may have reactivated traumatic memories.                                                                                                                                               |
| NYC parents and their children; N=434; (22)**                                                                                                     | 4 months                      | Posttraumatic Stress Disorder Reaction Index—Child Revision                                                                                | <i>Prevalence of severe to very severe PTSD symptomatology:</i> 18% of children; <i>Correlates of severe to very severe PTSD symptomatology:</i> parental PTSD since Sept. 11 (OR = 4.50), seeing parents cry (OR = 3.19), disaster images on television (OR = 3.18), living in Manhattan                                                                                                             |
| Nationally representative adult sample of persons residing outside of New York City; N=2729 at 9-23 days, 933 at 2 months, 787 at 6 months; (32)† | 9-23 days and; 2 and 6 months | Impact of Events Scale-Revised                                                                                                             | <i>Correlates of PTSD symptoms during follow-up:</i> female gender (OR = 1.42), prior mental disorder (OR = 1.60), behavioral disengagement (OR = 1.68), denial coping (OR = 1.33), sought social support (OR = 1.47), self-blame (OR = 1.66), self-distraction coping (OR = 1.31), acceptance (OR = 0.71); <i>Course:</i> prevalence of PTSD decreased from 17.0% at 2 months to 5.8% at 6 months    |
| Random samples of Manhattan residents (at 1 month) and all adults in NYC (at 4 and 6 months); N=988 at 1 month, 2001 at 4                         | 1, 4, and 6 months            | National Women's Study PTSD questionnaire                                                                                                  | <i>Current PTSD prevalence at 6 months among those with PTSD since Sept. 11:</i> 19.7%; <i>Correlates of PTSD since Sept. 11 at 6 months:</i> marital status, social support, previous lifetime traumatic events, pre-disaster life stressors, post-disaster life stressors, living south of 14 <sup>th</sup> St., seeing attacks in person, being                                                    |

|                                                                                                                                                                                                                                                                         |                                |                                                                                                |                                                                                                                                                                                                                                                                                                                                                                                                                                                                                                                                                        |
|-------------------------------------------------------------------------------------------------------------------------------------------------------------------------------------------------------------------------------------------------------------------------|--------------------------------|------------------------------------------------------------------------------------------------|--------------------------------------------------------------------------------------------------------------------------------------------------------------------------------------------------------------------------------------------------------------------------------------------------------------------------------------------------------------------------------------------------------------------------------------------------------------------------------------------------------------------------------------------------------|
| months, 1570 at 6 months; (25)§                                                                                                                                                                                                                                         |                                |                                                                                                |                                                                                                                                                                                                                                                                                                                                                                                                                                                                                                                                                        |
| Undergraduate volunteer participants at an urban university in the Midwest; N=305; (21)**                                                                                                                                                                               | 4-6 months                     | Self-report checklist based on DSM-IV PTSD criteria                                            | directly affected; <i>Correlates of current PTSD prevalence at 6 months among those with PTSD since Sept. 11</i> : job loss as results of attacks; <i>Course</i> : current PTSD prevalence in Manhattan decreased from 7.5% at 1 month to 1.7% at 4 months to 0.6% at 6 months<br><i>Prevalence of PTSD</i> : 5.9%; <i>Correlates of PTSD symptoms</i> : female gender, unmarried marital status, less education, prior history of mental health problems or psychological trauma, viewing television coverage of events, substance use since Sept. 11 |
| Sample of survivors of the Sept. 11 terrorist attack on the Pentagon; N=77; (26)**                                                                                                                                                                                      | 7 months                       | Impact of Events Scale-Revised                                                                 | <i>Prevalence of PTSD</i> : 14%; <i>Correlates of PTSD prevalence</i> : female gender, emotional response, peri-traumatic dissociation, lower perceived safety, increased alcohol use                                                                                                                                                                                                                                                                                                                                                                  |
| <i>Multiple Disaster Aggregate Samples</i>                                                                                                                                                                                                                              |                                |                                                                                                |                                                                                                                                                                                                                                                                                                                                                                                                                                                                                                                                                        |
| Survivors from 21 terrorist attacks that occurred in France between 1982 and 1987; N=254; (127)**                                                                                                                                                                       | From 4 months to >3 years      | 11 items based on DSM-III criteria for PTSD                                                    | <i>Prevalence of PTSD in total sample</i> : 18.1%; <i>Correlates of PTSD prevalence</i> : being severely injured (30.1% among severely injured, 8.3% among moderately injured, 10.5% among uninjured)                                                                                                                                                                                                                                                                                                                                                  |
| Persons from 2 disasters in Vlaanderen, Belgium: 128 survivors of a ballroom fire (Dec. 1994) and 55 survivors from a motor vehicle accident (Feb. 1996); N=183; (118)**                                                                                                | 7-9 months after each disaster | Composite International Diagnostic Interview PTSD module, based on DSM-III-R criteria for PTSD | <i>Incidence of PTSD</i> : 45.9%; <i>Correlates of PTSD incidence</i> : major depression, generalized anxiety disorder, agoraphobia without panic, any disorder other than PTSD                                                                                                                                                                                                                                                                                                                                                                        |
| Persons from 2 disasters in Vlaanderen, Belgium: 127 survivors of a ballroom fire (Dec. 1994) and 55 survivors from a motor vehicle accident (Feb. 1996); N=182; (115)**                                                                                                | 7-9 months after each disaster | Composite International Diagnostic Interview PTSD module, based on DSM-III-R criteria for PTSD | <i>Correlates of PTSD prevalence</i> : number of adverse life events post-disaster (OR = 1.84), severity of adverse life events post-disaster (OR = 1.18), loss of control (OR = 2.86), female gender (OR = 2.35)                                                                                                                                                                                                                                                                                                                                      |
| 46 hotel employees directly and indirectly exposed to a plane crash (Indianapolis, Oct. 1987); 19 employees from 2 businesses directly and indirectly exposed to a shooting spree (Arkansas, Dec. 1987); 42 survivors of a tornado (Florida, Apr. 1988); N=106; (119)** | 4-6 weeks after each disaster  | Diagnostic Interview Schedule/Disaster Supplement; caseness required meeting DSM-III criteria  | <i>Prevalence of PTSD</i> : 12.3% in total sample (21.7% in plane-hotel crash sample; 11.1% in shooting sample; 2.4% in tornado sample); <i>Correlates of PTSD symptoms</i> : being in the plane-hotel crash sample, directly exposed, more pre-disaster psychiatric diagnoses (among indirectly exposed)                                                                                                                                                                                                                                              |

\*Timing of assessment(s) after the disaster

\*\* Cross-sectional study design.

‡ OR, odds ratio.

† Prospective cohort study design.

§ Serial cross-sectional study design.

**WEB TABLE 3. Key studies assessing post-traumatic stress after natural disasters**

| Sample; N; (reference no.)                                                                                                     | Timeframe*                  | PTSD Measure                                                                                              | Main Findings                                                                                                                                                                                                                                                                                                                                                                                                                                                                                                                                                                                                                                                                                                                                                                 |
|--------------------------------------------------------------------------------------------------------------------------------|-----------------------------|-----------------------------------------------------------------------------------------------------------|-------------------------------------------------------------------------------------------------------------------------------------------------------------------------------------------------------------------------------------------------------------------------------------------------------------------------------------------------------------------------------------------------------------------------------------------------------------------------------------------------------------------------------------------------------------------------------------------------------------------------------------------------------------------------------------------------------------------------------------------------------------------------------|
| <i>1963 Vajont Landslide and Tidal Wave Flood Disaster, Northeast Italy—October 9, 1963</i>                                    |                             |                                                                                                           |                                                                                                                                                                                                                                                                                                                                                                                                                                                                                                                                                                                                                                                                                                                                                                               |
| Survivors still living in the disaster area 36 years later; N=39 (19)**                                                        | 36 years                    | Structured Clinical Interview for DSM-IV                                                                  | <i>Prevalence of PTSD:</i> 26% lifetime, 21% current; <i>Correlates of lifetime PTSD prevalence:</i> direct exposure to the tidal wave (greater exposure); <i>Course:</i> among the 10 persons with lifetime PTSD, 8 displayed a current diagnosis at 36 years                                                                                                                                                                                                                                                                                                                                                                                                                                                                                                                |
| <i>1983 Australian Bushfire, Southeastern Australia—February 16, 1983</i>                                                      |                             |                                                                                                           |                                                                                                                                                                                                                                                                                                                                                                                                                                                                                                                                                                                                                                                                                                                                                                               |
| Firefighters highly exposed to the bushfire; N=469 at 4 months, 395 at 11 months, 337 at 29 months; (68)†                      | 4, 11, and 29 months        | 12-item General Health Questionnaire; a half cutoff was used to determine caseness                        | <i>Correlates of PTSD prevalence at 4 months:</i> property loss, neuroticism, history of psychological disorder, life events before the fire; <i>Correlates of PTSD prevalence at 11 months:</i> property loss, panic during fire, neuroticism; <i>Correlates of PTSD prevalence at 29 months:</i> neuroticism, history of psychological disorder, life events between 11 and 29 months; <i>Course:</i> 32% prevalence at 4 months, 27% at 11 months, 30% at 29 months                                                                                                                                                                                                                                                                                                        |
| Community sample of firefighters exposed to the bushfire; N=314; (162)†                                                        | 4, 11, and 29 months        | 12-item General Health Questionnaire; a half cutoff was used to determine caseness                        | <i>Prevalence of PTSD anytime during follow-up:</i> 50.2%; <i>Prevalence of acute PTSD:</i> 9.2%; <i>Prevalence of chronic PTSD:</i> 21% (10.2% persistent chronic, 5.7% resolved chronic); <i>Prevalence of delayed-onset PTSD:</i> 19.7%; <i>Correlates of acute PTSD:</i> avoid thinking about problems; <i>Correlates of persistent chronic PTSD:</i> adverse life events before fire, avoid thinking about problems, psychological history, adversity since fire, distress from television reminders of fire, life events between 11 and 29 months; <i>Correlates of resolved chronic PTSD:</i> avoid thinking about problems, psychological history; <i>Correlates of delayed-onset PTSD:</i> distress from television reminders of fire, avoid thinking about problems |
| Students from 6 primary schools in highly exposed region; N=808 at 2 months; (220)†                                            | 2, 8, and 26 months         | Parent and teacher symptom scales                                                                         | <i>Correlates of PTSD symptoms at 26 months:</i> greater exposure, family separation at 2 months, loss of income, maternal fears of future fires, maternal intrusive thoughts, life events during follow-up; <i>Course:</i> symptom levels did not decrease significantly between 8 and 26 months                                                                                                                                                                                                                                                                                                                                                                                                                                                                             |
| Exposed firefighters at risk (n=112) and not at risk (n=35) for PTSD; N=147; (189)†                                            | 4, 11, 29, and 42 months    | Diagnostic Interview Schedule, based on DSM-III criteria                                                  | <i>Prevalence of PTSD at 42 months:</i> 34.0% considered definite cases, 13.6% considered borderline cases; <i>Correlates of PTSD:</i> property loss, greater exposure; <i>Correlates of chronic PTSD (PTSD not resolved at 42 months):</i> panic disorder after incident, phobic disorder after incident                                                                                                                                                                                                                                                                                                                                                                                                                                                                     |
| Exposed firefighters at risk (n=112) and not at risk (n=35) for PTSD; N=147; (173)†                                            | 4, 11, 29, and 42 months    | Diagnostic Interview Schedule, based on DSM-III criteria                                                  | <i>Correlates of PTSD prevalence:</i> use of problem focused coping, use of wishful thinking coping; <i>Correlates of chronic PTSD and delayed onset PTSD (vs. no PTSD):</i> use of wishful thinking coping, use of keeping to self coping                                                                                                                                                                                                                                                                                                                                                                                                                                                                                                                                    |
| Firefighters at risk for PTSD based on exposure, General Health Questionnaire scores, and Impact of Events Scale; N=50; (172)† | 4, 8, 11, 29, and 42 months | General Health Questionnaire, Impact of Events Scale, structured interviews, and the Diagnostic Interview | <i>Correlate of chronic PTSD at 42 months (vs. recovered cases):</i> difficulty concentrating; <i>Course:</i> 8 of 15 cases of definite or borderline PTSD at 8 months were still symptomatic at 42 months                                                                                                                                                                                                                                                                                                                                                                                                                                                                                                                                                                    |



|                                                                                                                         |                 |                                                                                                                                                             |                                                                                                                                                                                                                                                                                                                                                                     |
|-------------------------------------------------------------------------------------------------------------------------|-----------------|-------------------------------------------------------------------------------------------------------------------------------------------------------------|---------------------------------------------------------------------------------------------------------------------------------------------------------------------------------------------------------------------------------------------------------------------------------------------------------------------------------------------------------------------|
| Adults survivors from areas damaged by the tornadoes; N=116; (140)**                                                    | 5 months        | 1984 Tornadoes, Northeastern North Carolina—March 28, 1984<br>Modified version of the Hopkins Symptom Checklist; caseness required meeting DSM-III criteria | Prevalence of acute PTSD: 59%; Correlates of PTSD prevalence: depression and somatization                                                                                                                                                                                                                                                                           |
| Adult survivors from 75 shelters in the Mexico City area; N=573; (141)**                                                | Within 10 weeks | 1985 Earthquake, Mexico City, Mexico—September 19, 1985<br>A questionnaire based on DSM-III criteria for PTSD                                               | Prevalence of PTSD: 32%                                                                                                                                                                                                                                                                                                                                             |
| Adults from disaster exposed and unexposed communities; N=912; (148)**                                                  | 2 years         | 1985 Flooding and Mud Slides, Puerto Rico—October 1985<br>Diagnostic Interview Schedule/Disaster Supplement                                                 | Prevalence of PTSD: 3.7% among the exposed compared to 0.7% among the unexposed                                                                                                                                                                                                                                                                                     |
| Adults from disaster exposed and unexposed communities; N=912; (190)**                                                  | 2 years         | Diagnostic Interview Schedule/Disaster Supplement                                                                                                           | Correlates of lifetime PTSD symptoms: pre-disaster levels of lifetime PTSD symptoms, degree of disaster exposure                                                                                                                                                                                                                                                    |
| Adult survivors who were evacuated and/or applied for financial assistance; N=118; (149)**                              | 5 years         | 1988 Cyclone Bola, New Zealand—March 1988<br>Civilian Mississippi Scale; caseness determined using a cutoff score of 96                                     | Prevalence of PTSD: 12%; Correlates of PTSD prevalence: psychological distress as the time of the cyclone, current psychological distress, previous traumatic events, dissatisfaction with post-disaster assistance, dissatisfaction with post-disaster social support                                                                                              |
| Adults from 3 differentially damaged localities (substantial, moderate, and light damage); N=1295; (142)**              | 5 months        | 1988 Yun Nan Earthquake, Yun Nan Province, China—November 6, 1988<br>Diagnostic Interview Schedule, updated to reflect DSM-III-R criteria                   | Prevalence of PTSD among those meeting GHQ caseness: 23.4% in substantially damaged locality, 13.1% in moderately damaged, 16.3% in the lightly damaged; Estimated disaster-related PTSD in entire sample: 13.5% in substantially damaged locality, 6.2% in moderately damaged, 7.1% in the lightly damaged                                                         |
| Elderly adults and non-elderly adults from 3 Armenian cities (2 highly exposed, 1 mildly exposed); N=179; (191)**       | 1.5 years       | 1988 Earthquake in Armenia—December 7, 1988<br>Posttraumatic Stress Disorder Reaction Index                                                                 | Prevalence of severe to very severe PTSD symptomatology: 49.7%; Correlates of PTSD symptoms: greater exposure, loss of a family member                                                                                                                                                                                                                              |
| Children from 8 schools in 3 Armenian cities (severely exposed, moderately exposed, and mildly exposed); N=218; (164)** | 1.5 years       | Posttraumatic Stress Disorder Reaction Index                                                                                                                | Prevalence of severe to very severe PTSD symptomatology: 95% in severely exposed city, 71% in moderately exposed city, 26% in mildly exposed city; Correlates of PTSD symptoms: greater exposure, loss of family member, separation anxiety, female gender                                                                                                          |
| Adult employees of the Ministry of Health living in the earthquake region; N=1785; (184)**                              | 2 years         | Questionnaire based on DSM-III-R criteria adapted from the Diagnostic Interview Schedule/Disaster Supplement                                                | Prevalence of PTSD: 49.6%; Correlates of PTSD prevalence: protective factors included more education (OR $\pm$ = 0.6), male gender (OR = 0.6), being accompanied during the earthquake (OR = 0.6), making new friends after the earthquake (OR = 0.6); risk factors included greater exposure (OR = 7.0), financial loss (OR = 2.5), death in the family (OR = 2.6) |

|                                                                                                                                       |                                                         |                                                                                                      |                                                                                                                                                                                                                                                                                                                                                                                                                      |
|---------------------------------------------------------------------------------------------------------------------------------------|---------------------------------------------------------|------------------------------------------------------------------------------------------------------|----------------------------------------------------------------------------------------------------------------------------------------------------------------------------------------------------------------------------------------------------------------------------------------------------------------------------------------------------------------------------------------------------------------------|
| Exposed children who immediately relocated (n=24), exposed children who remained (n=25), and unexposed controls (n=25); N=74; (192)** | 2.5 years                                               | Diagnostic Interview for Children and Adolescents-Revised, based on DSM-III-R criteria               | <i>Prevalence of PTSD</i> : 32% in exposed group who remained, 28% in exposed group who relocated, 4% in unexposed group                                                                                                                                                                                                                                                                                             |
| Exposed mothers who immediately relocated (n=24), exposed mothers who remained (n=25), and unexposed controls (n=25); N=74; (159)**   | 2.5 years                                               | 17 items that asked about each of the 17 DSM-III-R PTSD symptoms                                     | <i>Prevalence of PTSD</i> : 92% in exposed group who remained, 89% in exposed group who relocated, 12% in comparison group                                                                                                                                                                                                                                                                                           |
| <i>1989 Hurricane Hugo, South Carolina—September 10-25, 1989</i>                                                                      |                                                         |                                                                                                      |                                                                                                                                                                                                                                                                                                                                                                                                                      |
| Exposed undergraduate psychology students; N=193; (144)**                                                                             | 1 month                                                 | Caseness required meeting DSM-III-R criteria                                                         | <i>Prevalence of PTSD</i> : 15%; <i>Correlates of PTSD symptoms</i> : resource loss, depression                                                                                                                                                                                                                                                                                                                      |
| Exposed preadolescent, early adolescent, and late adolescent children; N=5687; (193)**                                                | 3 months                                                | Reaction Index; caseness required meeting DSM-III-R criteria                                         | <i>Correlates of PTSD prevalence</i> : trait anxiety, degree of home damage reported, greater reported hurricane severity, being in an unfamiliar location during hurricane, continued displacement, parental job loss due to hurricane, feeling sad, anxious, worried, scared, alone, or angry during the hurricane                                                                                                 |
| Exposed students from Berkeley County, South Carolina middle and high schools; N=5687; (145)**                                        | 3 months                                                | Self-report version of the Reaction Index for Children; caseness required meeting DSM-III-R criteria | <i>Prevalence of PTSD</i> : 5.42%; <i>Correlates of PTSD prevalence</i> : female gender, younger age (pre-adolescent), decrease in school performance                                                                                                                                                                                                                                                                |
| Exposed students from 3 high schools in South Carolina; N=1264; (150)**                                                               | 1 year                                                  | 16-item symptom scale based on DSM-III-R criteria                                                    | <i>Prevalence of PTSD</i> : 4.0% (1.5% among Black males, 4.7% among Black females, 3.8% among White males, 6.2% among White females); <i>Correlates of PTSD prevalence</i> : greater exposure (OR = 1.26), violent traumatic events in year after incident (OR = 2.62), White ethnicity (OR = 2.03), female gender (OR = 2.17)                                                                                      |
| Exposed and unexposed adults from South Carolina, North Carolina, and Georgia; N=831; (146)†                                          | 12, 18, and 24 months                                   | 5-item scale asking about the occurrence of stress symptoms (e.g., easily startled, numb emotions)   | <i>Correlates of PTSD symptoms at 12 months</i> : injury, life threat, financial loss, personal loss, scope of impact; <i>Correlates of PTSD symptoms at 18 months</i> : injury, life threat, personal loss, scope of impact; <i>Correlates of PTSD symptoms at 24 months</i> : injury, life threat, financial loss, scope of impact                                                                                 |
| <i>1989 Loma Prieta Earthquake, San Francisco Bay Area, California—October 17, 1989</i>                                               |                                                         |                                                                                                      |                                                                                                                                                                                                                                                                                                                                                                                                                      |
| Stanford University undergraduates; N=250 at 14 days pre-disaster, 137 at 10 days post-disaster, 41 at 7 weeks; (182)†                | 14 days pre-disaster; 10 days and 7 weeks post-disaster | Items from the Interview to Diagnose Depression consistent with DSM-III-R criteria for PTSD          | <i>Correlates of PTSD symptoms at 10 days</i> : pre-disaster PTSD symptoms, perceived stressors, ruminative responses; <i>Correlates of PTSD symptoms at 7 weeks</i> : pre-disaster PTSD symptoms, ruminative responses; <i>Course</i> : PTSD symptoms increased significantly from 14 days pre-disaster to 10 days post-disaster; symptoms did not decrease significantly between 10 days and 7 weeks post-disaster |
| Exposed children from 3 Bay Area communities; N=22; (165)**                                                                           | 6-8 months                                              | Posttraumatic Stress Reaction Index for Children                                                     | <i>Prevalence of PTSD severity</i> : 27% reported moderate levels of PTSD symptoms and 36% reported mild levels of PTSD symptoms; <i>Correlates of PTSD symptoms</i> : proximity to highly damaged area (section of collapsed highway)                                                                                                                                                                               |
| Exposed emergency services                                                                                                            | 1.5 and 3.5                                             | Impact of Events Scale-                                                                              | <i>Correlates of PTSD symptoms at 3.5 years</i> : greater peri-traumatic dissociation                                                                                                                                                                                                                                                                                                                                |

|                                                                                                                      |                           |                                                                                             |                                                                                                                                                                                                                                                                                                                                                                                                                                                                                                                                                                                                                |
|----------------------------------------------------------------------------------------------------------------------|---------------------------|---------------------------------------------------------------------------------------------|----------------------------------------------------------------------------------------------------------------------------------------------------------------------------------------------------------------------------------------------------------------------------------------------------------------------------------------------------------------------------------------------------------------------------------------------------------------------------------------------------------------------------------------------------------------------------------------------------------------|
| personnel who responded to the I-880 Freeway collapse and unexposed rescue workers and civilians; N=322; (227)†      | years                     | Revised                                                                                     |                                                                                                                                                                                                                                                                                                                                                                                                                                                                                                                                                                                                                |
| <i>1989 Newcastle Earthquake, Newcastle, Australia—December 28, 1989</i>                                             |                           |                                                                                             |                                                                                                                                                                                                                                                                                                                                                                                                                                                                                                                                                                                                                |
| Random sample of adult Newcastle residents; N=3007; (147)**                                                          | 6 months                  | Impact of Events Scale                                                                      | <i>Prevalence of PTSD among those exposed to high levels of threat:</i> 18.3%; <i>Correlates of PTSD symptoms:</i> female gender, older age, threat experiences, disruption experiences, avoidance coping                                                                                                                                                                                                                                                                                                                                                                                                      |
| Random sample of elderly and non-elderly Newcastle adults; N=3007; (185)**                                           | 6 months                  | Impact of Events Scale                                                                      | <i>Correlates of PTSD symptoms:</i> female gender, being in elderly group, greater exposure; <i>Correlates of PTSD symptoms among the elderly:</i> female gender, threat and disruption experiences due to the earthquake, use of support services, behavioral and avoidance coping                                                                                                                                                                                                                                                                                                                            |
| 250 adult immigrants from non-English speaking backgrounds and 250 Australian-born matched controls; N=500; (210)**  | 6 months                  | Impact of Events Scale                                                                      | <i>Correlates of PTSD symptoms:</i> less education, female gender, being in immigrant group, greater exposure to earthquake, avoidance coping, interaction between female gender and immigrant status, interaction between female gender and older age at time of immigration                                                                                                                                                                                                                                                                                                                                  |
| Random sample of adult Newcastle residents (n=539) with oversample of highly exposed (n=306); N=845; (211)†          | 27, 50, 86, and 144 weeks | Impact of Events Scale; cut-off score of 25 identified those with a high likelihood of PTSD | <i>Course:</i> between 6 months and 2 years PTSD prevalence decreased from 11% to 3% in the low exposure group, from 19% to 8% in the group experiencing disruption, from 23% to 13% in the group experiencing threat, and from 40% to 19% in the group experiencing both disruption and threat; <i>Correlates of PTSD scores:</i> older age, life events 6 months before incident, being injured, greater initial exposure, life events since incident, ongoing disruptions since incident                                                                                                                    |
| Random sample of adult Newcastle residents (n=539) with oversample of highly exposed (n=306); N=845; (169)†          | 27, 50, 86, and 144 weeks | Impact of Events Scale                                                                      | <i>Correlates of PTSD symptoms:</i> older age, neuroticism, greater initial exposure, avoidance coping, ongoing disruptions since incident                                                                                                                                                                                                                                                                                                                                                                                                                                                                     |
| Survivors with high levels of threat or disruption exposure; N=515; (206)†                                           | 27, 50, 86, and 144 weeks | Impact of Events Scale; cut-off score of 25 identified those with a high likelihood of PTSD | <i>Prevalence of PTSD:</i> 18.8% acute PTSD, 14.4% persistent PTSD; <i>Correlates of acute PTSD:</i> emotional problems in 6 months pre-disaster, life events in months 6 pre-disaster, threat earthquake exposure, neuroticism, avoidance coping, life events and ongoing disruptions since the earthquake; <i>Correlates of persistent PTSD:</i> older age, female gender, less education, emotional problems in 6 months pre-disaster, life events in 6 months pre-disaster, threat earthquake exposure, neuroticism, active and avoidance coping, life events and ongoing disruptions since the earthquake |
| <i>1990 Wildfire, Southern California—June 27, 1990</i>                                                              |                           |                                                                                             |                                                                                                                                                                                                                                                                                                                                                                                                                                                                                                                                                                                                                |
| Exposed children and adolescents (n=23) from homes damaged or destroyed and unexposed children (n=10); N=33; (200)** | 6 weeks                   | Diagnostic Interview for Children and Adolescents-Revised                                   | <i>Correlates of PTSD symptoms:</i> exposed children and adolescents met significantly more PTSD symptom criteria than controls                                                                                                                                                                                                                                                                                                                                                                                                                                                                                |
| Children from families that experienced severe or low loss;                                                          | 6 weeks                   | Diagnostic Interview for Children and Adolescents                                           | <i>Prevalence of PTSD:</i> 2 of 13 children who experienced severe levels of loss had PTSD; <i>Correlates of PTSD symptoms:</i> resource loss, number of PTSD                                                                                                                                                                                                                                                                                                                                                                                                                                                  |

|                                                                                                                                  |                                                      |                                                                                                                                                      |                                                                                                                                                                                                                                                                                                                                                                                                                                                                                                                                                                                                                                                       |
|----------------------------------------------------------------------------------------------------------------------------------|------------------------------------------------------|------------------------------------------------------------------------------------------------------------------------------------------------------|-------------------------------------------------------------------------------------------------------------------------------------------------------------------------------------------------------------------------------------------------------------------------------------------------------------------------------------------------------------------------------------------------------------------------------------------------------------------------------------------------------------------------------------------------------------------------------------------------------------------------------------------------------|
| N=22; (59)**                                                                                                                     |                                                      |                                                                                                                                                      | symptoms reported by parent                                                                                                                                                                                                                                                                                                                                                                                                                                                                                                                                                                                                                           |
| Displaced tribal and non-tribal adult survivors from 3 resettlement sites; N=351; (228)**                                        | 6 years                                              | 1991 Mount Pinatubo Volcanic Disaster, Philippines—June 12, 1991<br>17-item PTSD Checklist; caseness required meeting DSM-IV criteria for PTSD       | Prevalence of PTSD: 27.6%                                                                                                                                                                                                                                                                                                                                                                                                                                                                                                                                                                                                                             |
| Direct survivors, college students forced to evacuate, and graduate students not forced to evacuate; N=154 at 7-9 months; (203)† | 1 month and 7-9 months                               | 1991 Oakland/Berkeley Firestorm—October 20, 1991<br>Civilian Version of the Mississippi Scale for Combat-Related PTSD and the Impact of Events Scale | Correlates of PTSD symptoms (Mississippi Scale): dissociative symptoms, recent life stress, symptoms of loss of personal autonomy; <i>Correlates of PTSD symptoms (Impact of Events Scale)</i> : dissociative symptoms, recent life events, symptoms of loss of personal autonomy, contact with the fire, previous life events                                                                                                                                                                                                                                                                                                                        |
| Exposed children from an elementary school in southern Dade county, Florida; N=92; (151)†                                        | 15 months pre-disaster; 3 and 7 months post-disaster | 1992 Hurricane Andrew, August 16-28, 1992<br>Posttraumatic Stress Disorder-Reaction Index for Children                                               | <i>Correlates of PTSD symptoms at 3 months</i> : greater exposure, anxiety 15 months pre-disaster, greater student inattentiveness 15 months pre-disaster, worse academic skills 15 months pre-disaster; <i>Correlates of PTSD symptoms at 7 months</i> : greater exposure, African American ethnicity, anxiety 15 months pre-disaster; <i>Correlates of persistent PTSD symptoms</i> : African American ethnicity, anxiety 15 months pre-disaster; <i>Course of severe to very severe PTSD</i> : prevalence decreased from 13% at 3 months to 3% at 7 months                                                                                         |
| Exposed college psychology students; N=220; (178)**                                                                              | 1 month                                              | Reaction Index                                                                                                                                       | <i>Correlates of PTSD symptoms</i> : being in more highly impacted group, depression                                                                                                                                                                                                                                                                                                                                                                                                                                                                                                                                                                  |
| Volunteer subjects from communities damaged by the hurricane; N=180; (199)**                                                     | 1-4 months                                           | PTSD in past week assessed using DSM-III-R criteria                                                                                                  | <i>Prevalence of PTSD</i> : 33%; <i>Correlates of PTSD prevalence</i> : hurricane damage, perceived loss, greater injury, perceived life threat                                                                                                                                                                                                                                                                                                                                                                                                                                                                                                       |
| Children from 3 elementary schools severely affected by the hurricane; N=568; (166)**                                            | 3 months                                             | Posttraumatic Stress Disorder Reaction Index for Children, based on DSM-III-R criteria                                                               | <i>Prevalence of severe to very severe PTSD symptomatology</i> : 30%; <i>Correlates of PTSD symptoms</i> : perceived life threat, number of life threatening experiences, loss-disruption experiences, female gender, less social support from teachers, less social support from classmates, blame and anger coping, social withdrawal, positive coping                                                                                                                                                                                                                                                                                              |
| Children in grades from 3 elementary schools in southern Dade county Florida exposed to the hurricane; N=442; (187)†             | 3, 7, and 10 months                                  | Posttraumatic Stress Disorder Reaction Index for Children, based on DSM-III-R criteria                                                               | <i>Correlates of PTSD symptoms at 10 months</i> : perceived life threat, life threatening experiences, loss/disruption events in 10 months post-disaster, African American ethnicity, Hispanic ethnicity, less social support from teacher, blame and anger coping; <i>Correlates of persistent PTSD symptoms</i> : loss and disruption post-disaster, African American ethnicity, Hispanic ethnicity, intervening life events, low levels of parental social support; <i>Correlates of persistent PTSD symptoms between 3 and 10 months</i> : <i>Course</i> : prevalence decreased from 39.1% at 3 months to 24.0% at 7 months to 18.1% at 10 months |
| Exposed adolescent residents from Dade County, Florida; N=400; (152)**                                                           | 6 months                                             | Diagnostic Interview Schedule, based on DSM-III-R criteria                                                                                           | <i>Prevalence of PTSD</i> : 9.2% among females, 2.9% among males; <i>Correlates of PTSD prevalence</i> : older age (OR = 1.41), undesirable life events after the incident (OR = 1.38)                                                                                                                                                                                                                                                                                                                                                                                                                                                                |
| Exposed residents (134 Latino, 135                                                                                               | 6 months                                             | 30-item Revised Civilian                                                                                                                             | <i>Prevalence of PTSD</i> : 24% in total sample (38% among Spanish-preferring Latinos,                                                                                                                                                                                                                                                                                                                                                                                                                                                                                                                                                                |

|                                                                                                                                  |                                                       |                                                                                                                                                                                                 |                                                                                                                                                                                                                                                                                                                                                                                                                                                                                                                                                                                                                                                                                                                                                                                                                                                                                                                                                                                                                                                                                                       |
|----------------------------------------------------------------------------------------------------------------------------------|-------------------------------------------------------|-------------------------------------------------------------------------------------------------------------------------------------------------------------------------------------------------|-------------------------------------------------------------------------------------------------------------------------------------------------------------------------------------------------------------------------------------------------------------------------------------------------------------------------------------------------------------------------------------------------------------------------------------------------------------------------------------------------------------------------------------------------------------------------------------------------------------------------------------------------------------------------------------------------------------------------------------------------------------------------------------------------------------------------------------------------------------------------------------------------------------------------------------------------------------------------------------------------------------------------------------------------------------------------------------------------------|
| Black, 135 White) from 5 neighborhoods in Dade county, Florida; N=404; (153)**                                                   |                                                       | Mississippi Scale; caseness required meeting DSM-IV criteria for PTSD                                                                                                                           | 23% among African Americans, 19% among English-preferring Latinos, 15% among Whites); ethnic differences in PTSD prevalence remained in the highly traumatized groups after controlling for levels of personal and neighborhood trauma                                                                                                                                                                                                                                                                                                                                                                                                                                                                                                                                                                                                                                                                                                                                                                                                                                                                |
| Residents from areas most severely affected; N=61; (194)**                                                                       | 6-12 months                                           | Structured Clinical Interview for DSM-III-R                                                                                                                                                     | <i>Prevalence of new-onset PTSD: 36%; Correlates of PTSD prevalence: severe damage to home</i>                                                                                                                                                                                                                                                                                                                                                                                                                                                                                                                                                                                                                                                                                                                                                                                                                                                                                                                                                                                                        |
| Adult survivors involved in rebuilding; N=96; (204)†                                                                             | 1-4 and 9-12 months                                   | 17 questions that asked about the frequency of DSM-III-R PTSD symptoms                                                                                                                          | <i>Correlates of PTSD symptoms at 9 months: intensity of disruption over past month of repair phase</i>                                                                                                                                                                                                                                                                                                                                                                                                                                                                                                                                                                                                                                                                                                                                                                                                                                                                                                                                                                                               |
| Highly exposed students from an elementary school in the hurricane pathway and mildly exposed controls; N=106 at 8 weeks; (201)† | 8 weeks for total sample; 32 weeks for highly exposed | Posttraumatic Stress Disorder Reaction Index, based on DSM-III-R criteria                                                                                                                       | <i>Prevalence of severe to very severe PTSD symptomatology at 8 weeks: 56.4% among highly exposed compared to 38.6% among mildly exposed; Course: prevalence of severe to very severe PTSD symptomatology among the highly exposed decreased from 55.3% at 8 weeks to 38.3% 32 weeks</i>                                                                                                                                                                                                                                                                                                                                                                                                                                                                                                                                                                                                                                                                                                                                                                                                              |
| Exposed elementary school students; N=30; (229)†                                                                                 | 2, 8, and 21 months                                   | Posttraumatic Stress Disorder Reaction Index, based on DSM-III-R criteria                                                                                                                       | <i>Course: Between 2 and 8 months, PTSD symptoms improved in 30% of the sample, showed no change in 53%, and worsened in 17%; between 2 months and 21 months after the incident, 46.7% improved, 46.7% showed no change, and 6.6% worsened</i>                                                                                                                                                                                                                                                                                                                                                                                                                                                                                                                                                                                                                                                                                                                                                                                                                                                        |
| Exposed residents of Dade County, Florida; N=404 at 6 months, 241 at 28-30 months; (207)†                                        | 6 and 28-30 months                                    | 30-item Revised Civilian Mississippi Scale; caseness required meeting DSM-IV criteria for PTSD                                                                                                  | <i>Correlates of avoidance symptoms at 6 months: minority status, life events post-disaster, less self-esteem, less perceived control; Correlates of avoidance symptoms at 28-30 months: avoidance scores at 6 months, female gender, past year trauma, acculturative stress, less self-esteem, less social embeddedness; Correlates of intrusion symptoms at 6 months: female gender, minority status, Latino ethnicity, younger age, being married, threat to life, life events post-disaster; Correlates of intrusion symptoms at 28-30 months: intrusion scores at 6 months, less self-esteem, life-events post-disaster; Correlates of arousal symptoms at 6 months: female gender, African American ethnicity, property damage, life events post-disaster; Correlates of arousal symptoms at 28-30 months: arousal scores at 6 months, injury, life events post-disaster, less self-esteem; Course: PTSD prevalence increased from 25.7% at 6 months to 28.6% at 28-30 months; symptoms of intrusion and arousal declined significantly over follow-up, but symptoms of avoidance increased</i> |
| Population survey of US military personnel and spouses exposed to all 5 typhoons; N=320; (154)**                                 | 8 months after 1 <sup>st</sup> typhoon                | 1992 Typhoons in US Pacific, Guam—August 28, 1992–November 1992<br>Validated symptom scale and the Impact of Events Scale; caseness required meeting DSM-IV criteria and scoring >19 on the IES | <i>Prevalence of PTSD: 5.9%; Correlates of PTSD prevalence: diagnosis of Acute Stress Disorder at 1 week after first typhoon</i>                                                                                                                                                                                                                                                                                                                                                                                                                                                                                                                                                                                                                                                                                                                                                                                                                                                                                                                                                                      |

|                                                                                                                                   |                      |                                                                                                                  |                                                                                                                                                                                                                                                                                                                                                                      |
|-----------------------------------------------------------------------------------------------------------------------------------|----------------------|------------------------------------------------------------------------------------------------------------------|----------------------------------------------------------------------------------------------------------------------------------------------------------------------------------------------------------------------------------------------------------------------------------------------------------------------------------------------------------------------|
| <i>1993 Floods, Perth, Scotland—January 17, 1993</i>                                                                              |                      |                                                                                                                  |                                                                                                                                                                                                                                                                                                                                                                      |
| Exposed adults residents who suffered material loss in the flood; N=44; (155)**                                                   | Not reported         | Questionnaire asking about the frequency of DSM-III-R PTSD symptoms                                              | <i>Prevalence of PTSD: 25%; Correlates of PTSD symptoms:</i> emotion-focused coping, thought suppression coping                                                                                                                                                                                                                                                      |
| <i>1993 Great Midwest Floods—1993</i>                                                                                             |                      |                                                                                                                  |                                                                                                                                                                                                                                                                                                                                                                      |
| Exposed adults from Des Moines and West Des Moines; N=106; (208)**                                                                | 4 months             | 6 modified questions from the University of Michigan version of the Composite International Diagnostic Interview | <i>Correlates of PTSD symptoms:</i> more anxiety after the flood, temporary or permanent loss of employment because of the flood, renting property, lower likelihood of identifying positive outcomes                                                                                                                                                                |
| Exposed St. Louis area residents; N=162; (156)**                                                                                  | 2-7 months           | Diagnostic Interview Schedule/Disaster Supplement, based on DSM-III-R criteria                                   | <i>Prevalence of flood-related PTSD: 22%; Correlates of PTSD prevalence:</i> prior psychiatric history, non-PTSD post-disaster disorder                                                                                                                                                                                                                              |
| <i>1993 Marathwada Earthquake, Western India—September 30, 1993</i>                                                               |                      |                                                                                                                  |                                                                                                                                                                                                                                                                                                                                                                      |
| Adults from 23 households within 15 km of the epicenter; N=56; (157)**                                                            | 1 month              | PTSD diagnosis according to DSM-III-R criteria                                                                   | <i>Prevalence of PTSD: 23%</i>                                                                                                                                                                                                                                                                                                                                       |
| <i>1994 Northridge Earthquake, Los Angeles Area—January 17, 1994</i>                                                              |                      |                                                                                                                  |                                                                                                                                                                                                                                                                                                                                                                      |
| Survivors from the area of greatest property damage; N=130; (177)**                                                               | 3 months             | Diagnostic Interview Schedule/Disaster Supplement, based on DSM-III criteria                                     | <i>Prevalence of PTSD: 13%; Correlates of PTSD prevalence:</i> history of psychiatric disorder (OR = 5.30), female gender (OR = 6.49), post-disaster non-PTSD psychiatric disorder (OR = 6.24)                                                                                                                                                                       |
| Children from a family-genetic study diagnosed with a preexisting psychopathology; N=63; (179)**                                  | 1 year               | Children's Posttraumatic Stress Disorder Reaction Index                                                          | <i>Correlates of PTSD symptoms:</i> preexisting anxiety disorder, use of cognitive coping, current general anxiety, current depression, social adjustment problems with friends                                                                                                                                                                                      |
| <i>1994 Avalanche, Norway—March 3, 1994</i>                                                                                       |                      |                                                                                                                  |                                                                                                                                                                                                                                                                                                                                                                      |
| Norwegian soldiers buried by the avalanche, involved in the rescue effort, or unexposed; N=133 at 2 weeks, 94 at 4 months; (175)† | 2 weeks and 4 months | Impact of Events Scale and the Posttraumatic Stress Scale-10; caseness required a PTSS-10 score $\geq 5$         | <i>Correlates of PTSD symptoms at 2 weeks:</i> being in buried, involvement in rescue, lower coping scores; <i>Course:</i> prevalence of PTSD in the total sample decreased from 6% at 2 weeks to 3% at 4 months; (prevalence increased from 9% to 12% among those buried, decreased from 10% to 0% among rescuers, and decreased from 4% to 2% among the unexposed) |
| <i>1995 Hanshin-Awaji Earthquake, Japan—January 17, 1995</i>                                                                      |                      |                                                                                                                  |                                                                                                                                                                                                                                                                                                                                                                      |
| Elderly adults and non-elderly adults from a Shelter in Kobe; N=142 at 3 weeks, 123 at 8 weeks; (213)§                            | 3 and 8 weeks        | 10 items from the Posttraumatic Symptoms Scale                                                                   | <i>Course:</i> between 3 and 8 weeks, the average number of symptoms experienced did not decrease significantly among non-elderly adults, but did decrease significantly among elderly adults                                                                                                                                                                        |
| Adult employees of 5 manufacturing companies in the exposed area; N=380; (188)**                                                  | 13-15 months         | 17-item questionnaire based on DSM-IV criteria                                                                   | <i>Correlates of PTSD symptoms:</i> poor perceived physical health, earthquake-related life events, no emotional support network (males only), older age (males only), being unmarried (males only)                                                                                                                                                                  |
| Male workers employed by companies located in the exposed area; N=155; (195)**                                                    | 14-18 months         | 19-item questionnaire based on DSM criteria; caseness required scoring $\geq 9$                                  | <i>Prevalence of PTSD: 9.0%; Correlates of PTSD symptoms:</i> living in areas of higher seismic intensity                                                                                                                                                                                                                                                            |

|                                                                                                             |                       |                                                                                                                   |                                                                                                                                                                                                                                                                                                                                             |
|-------------------------------------------------------------------------------------------------------------|-----------------------|-------------------------------------------------------------------------------------------------------------------|---------------------------------------------------------------------------------------------------------------------------------------------------------------------------------------------------------------------------------------------------------------------------------------------------------------------------------------------|
| Random selection of male residents of the town closest to the epicenter; N=108; (205)**                     | 20 months             | 19-item questionnaire based on DSM-IV criteria for PTSD                                                           | <i>Correlates of PTSD symptoms</i> : reporting worse lifestyle/health practices after the earthquake                                                                                                                                                                                                                                        |
|                                                                                                             |                       | <i>1995 Hurricane Opal, Florida—October, 1995</i>                                                                 |                                                                                                                                                                                                                                                                                                                                             |
| Exposed adult residents; N=67; (174)**                                                                      | 4-5 months            | Impact of Events                                                                                                  | <i>Correlates of PTSD symptoms</i> : coping self efficacy; coping self efficacy mediated the relation between loss of resources and PTSD symptoms                                                                                                                                                                                           |
|                                                                                                             |                       | <i>1997 Floods, Central Valley, Northern California—Early 1997</i>                                                |                                                                                                                                                                                                                                                                                                                                             |
| Residents from rural/agricultural areas devastated by the floods; N=131 at 1-3 months, 74 at 1 year; (230)† | 1-3 months and 1 year | 17-item PTSD Checklist; PTSD caseness required meeting DSM-IV criteria                                            | <i>Prevalence of PTSD at 1 year</i> : 10%; <i>Correlates of PTSD symptoms</i> : greater exposure to loss, acute stress disorder symptoms between 1 and 3 months                                                                                                                                                                             |
|                                                                                                             |                       | <i>1998 Zhangbei-Shangyi Earthquake, North Hebei Province, China—January 10, 1998</i>                             |                                                                                                                                                                                                                                                                                                                                             |
| Adults from a highly exposed and a moderately exposed village; N=181 at 3 months, 157 at 9 months; (215)†   | 3 and 9 months        | DSM-IV diagnoses made using an instrument based on the Composite International Diagnostic Interview PTSD module   | <i>Prevalence of current PTSD at 3 months</i> : 14.4% (22.7% among moderately exposed compared to 8.5% among highly exposed); <i>Prevalence of current PTSD at 9 months</i> : 17.8% (22.7% among moderately exposed compared to 14.3% among highly exposed); <i>Course</i> : prevalence increased between 3 and 9 months                    |
|                                                                                                             |                       | <i>1998 Sarno Landslide, Southern Italy—May 5, 1998</i>                                                           |                                                                                                                                                                                                                                                                                                                                             |
| Exposed adults (n=272) from the most severely affected area and unexposed controls (n=72); N=344; (180)**   | 1 year                | Self-Rating Scale for PTSD, derived from Structured Interview for PTSD; caseness required meeting DSM-IV criteria | <i>Prevalence of PTSD</i> : 27.6% among exposed compared to 1.4% among unexposed; <i>Correlates of PTSD prevalence</i> : physical injury, injuries suffered by family members, family problems, leaving the house in the past 3 months, depressive symptoms, anxiety symptoms                                                               |
|                                                                                                             |                       | <i>1998 Hurricane Mitch, Nicaragua—October 1998</i>                                                               |                                                                                                                                                                                                                                                                                                                                             |
| Adolescents from 3 public schools in 3 differentially exposed cities; N=156; (143)**                        | 6 months              | Child Posttraumatic Stress Disorder Reaction Index; caseness required scoring $\geq 40$                           | <i>Prevalence of PTSD</i> : 90% in the most devastated city and 14% in the least devastated city; <i>Correlates of PTSD symptoms</i> : being in more devastated city, objective hurricane related experiences, subjective hurricane related experiences, current thoughts of revenge                                                        |
| Consecutive exposed adult patients from 4 primary health centers; N=496; (183)†                             | 6 and 12 months       | Harvard Trauma Questionnaire; caseness defined using a cutoff of 50/51                                            | <i>Prevalence of PTSD at 6 months</i> : 5.9%; <i>Correlates of PTSD symptoms</i> : death or injury of relative, destruction of house, female gender, previous mental health problems, illiteracy, never married; <i>Course</i> : 12 of 23 (52%) PTSD cases identified at 6 months and followed-up at 12 months still had PTSD               |
|                                                                                                             |                       | <i>1999 Chi-Chi Earthquake, Taiwan—September 21, 1999</i>                                                         |                                                                                                                                                                                                                                                                                                                                             |
| Survivors who consecutively sought psychiatric service; N=525; (176)**                                      | 1 month               | 17-item checklist based on DSM-IV criteria for PTSD                                                               | <i>Correlates of reexperiencing PTSD symptoms</i> : female gender, injury of relatives, nervous traits, obsessive traits; <i>Correlates of avoidance PTSD symptoms</i> : nervous traits, obsessive traits; <i>Correlates of arousal PTSD symptoms</i> : female gender, older age, destruction of property, nervous traits, obsessive traits |
| Students from 2 junior high schools who remained in the worst affected area, Chungliiao; N=323; (168)**     | 6 weeks               | Children's Interview for Psychiatric Syndromes based on DSM-IV criteria                                           | <i>Prevalence of PTSD</i> : 21.7%; <i>Correlates of PTSD prevalence</i> : physical injury (OR = 2.35), death of a close family member with whom the student lived (OR = 5.58)                                                                                                                                                               |

|                                                                                                                                                                      |                                                   |                                                                                                                                                                                |                                                                                                                                                                                                                                                                              |
|----------------------------------------------------------------------------------------------------------------------------------------------------------------------|---------------------------------------------------|--------------------------------------------------------------------------------------------------------------------------------------------------------------------------------|------------------------------------------------------------------------------------------------------------------------------------------------------------------------------------------------------------------------------------------------------------------------------|
| Survivors from Pu-Li, one of the most damaged towns, screened at a local hospital; N=663; (231)**                                                                    | 3-4 months                                        | 17-item checklist based on DSM-IV PTSD criteria; caseness required greater than 2 reexperiencing, 4 avoidance, and 3 arousal symptoms                                          | <i>Prevalence of PTSD: 11.3%; Correlates of PTSD prevalence: female gender (OR = 2.69), older age (OR = 7.83), severe destruction to home (OR = 2.93)</i>                                                                                                                    |
| Male professional firefighters involved in rescue work following the collapse of a building in Taipei City; N=84; (163)**                                            | 5 months                                          | Impact of Events Scale; caseness required scoring $\geq 26$                                                                                                                    | <i>Prevalence of PTSD: 21.4%; Correlates of PTSD prevalence: longer job experience (OR = 6.87), distancing coping (OR = 2.20), use of escape-avoidance coping (OR = 1.43), positive reappraisal coping (protective) (OR = 0.59)</i>                                          |
| <i>1999 Turkey Earthquakes, Marmara region, Turkey—August 17, 1999 and November 12, 1999</i>                                                                         |                                                   |                                                                                                                                                                                |                                                                                                                                                                                                                                                                              |
| Exposed school-aged children (n=202) displaced to a prefabricated village and unexposed children (n=101); N=303; (196)**                                             | 4-5 months                                        | Child Version of the Posttraumatic Stress Reaction Index                                                                                                                       | <i>Correlates of PTSD symptoms: being in exposed group, lack of sleep in days after earthquake, past traumatic experiences, personal losses, traumatic dissociation and grief</i>                                                                                            |
| Adult survivors from 3 “tent cities” and 2 prefabricated housing sites in the disaster region; N=1000; (197)**                                                       | 3-9 months in camps; 7-14 months in housing sites | 17-item Traumatic Stress Symptom Checklist based on DSM-IV criteria; caseness determined using cutoff of 25                                                                    | <i>Prevalence of PTSD: 43%; Correlates of PTSD symptoms: fear during the earthquake, female gender, trapped under rubble, death of a family member, past psychiatric illness, participated in rescue work, longer time between earthquake and assessment, less education</i> |
| 35 randomly selected families (30 fathers, 35 mothers, 49 children) living in a tent city 30 km from the epicenter of the 2 <sup>nd</sup> earthquake; N=114; (209)** | 6 months after 2 <sup>nd</sup> quake              | For children, the Child Posttraumatic Stress Disorder Reaction Index; for adults, the 17-item Self-rating Scale for Posttraumatic Stress Disorder, based on DSM-III-R criteria | <i>Prevalence of PTSD among parents: 44.1% among mothers, 34.5% among fathers; Correlates of PTSD symptoms among children: PTSD in father, female gender, paternal depression symptoms</i>                                                                                   |
| Consecutive self-referred adult survivors from a community center for psychological treatment; N=1027; (158)**                                                       | 14 months                                         | 17-item Traumatic Stress Symptom Checklist based on DSM-IV criteria; caseness determined using cutoff of 25                                                                    | <i>Prevalence of PTSD: 63%; Correlates of PTSD symptoms: fear during the earthquake, female gender, less education, loss of friends or neighbors, shorter time between earthquake and assessment, material loss</i>                                                          |
| Adult survivors from 3 prefabricated housing sites within 10 km of the epicenter; N=568; (219)**                                                                     | 20 months                                         | 17-item Traumatic Stress Symptom Checklist based on DSM-IV criteria; caseness determined using cutoff of 25                                                                    | <i>Prevalence of PTSD: 39%; Correlates of PTSD symptoms: fear during the earthquake, female gender, older age, participation in rescue work, loss of friends or neighbors, history of psychiatric illness</i>                                                                |
| Adult survivors from randomly sample households in Bolu (45 km from                                                                                                  | 18 months after 2 <sup>nd</sup>                   | 17-item Traumatic Stress Symptom Checklist based                                                                                                                               | <i>Prevalence of PTSD: prevalence was 41.9% in Duzce (the epicenter), 18.6% in Bolu (45 km from the epicenter); Correlates of PTSD prevalence: fear during</i>                                                                                                               |



|                                                                                                                                                                                                                    |                                             |                                                                                            |                                                                                                                                                                                                                                                                                                                                                                                                                                                                                                |
|--------------------------------------------------------------------------------------------------------------------------------------------------------------------------------------------------------------------|---------------------------------------------|--------------------------------------------------------------------------------------------|------------------------------------------------------------------------------------------------------------------------------------------------------------------------------------------------------------------------------------------------------------------------------------------------------------------------------------------------------------------------------------------------------------------------------------------------------------------------------------------------|
| the 2 <sup>nd</sup> earthquake) and Duzce (at the epicenter); N=430; (214)**                                                                                                                                       | quake                                       | on DSM-IV criteria; caseness determined using cutoff of 25                                 | the earthquake, loss of friends and neighbors, female gender, less education, living in rented accommodation                                                                                                                                                                                                                                                                                                                                                                                   |
| <i>1999 Hurricane Floyd—September 1999</i>                                                                                                                                                                         |                                             |                                                                                            |                                                                                                                                                                                                                                                                                                                                                                                                                                                                                                |
| Fourth grade students from a North Carolina public school destroyed by the hurricane; N=150; (167)**                                                                                                               | 6 months                                    | Child Version of the Posttraumatic Stress Reaction Index                                   | <i>Prevalence of severe to very severe PTSD symptomatology:</i> 34.6%; <i>Correlates of severe to very severe PTSD symptomatology:</i> female gender (OR = 2.7), flooding of home (OR = 3.0); <i>Correlates of PTSD symptoms:</i> social withdrawal coping, self-criticism coping, blaming others coping, problem solving coping, emotional regulation coping                                                                                                                                  |
| <i>1999 Taiwan Earthquake, Nantou Country, Taiwan—September 21, 1999</i>                                                                                                                                           |                                             |                                                                                            |                                                                                                                                                                                                                                                                                                                                                                                                                                                                                                |
| Bereaved survivors from 109 households from 2 townships; N=120; (171)**                                                                                                                                            | 2 months                                    | Mini-International Neuropsychiatric Interview, with diagnosis according to DSM-IV criteria | <i>Prevalence of PTSD:</i> 37%; <i>Correlates of PTSD prevalence:</i> number of psychosocial stressors (OR = 3.03), initial feelings of guilt (OR = 3.69)                                                                                                                                                                                                                                                                                                                                      |
| <i>1999 Orissa Supercyclone, Orissa, India—October 1999</i>                                                                                                                                                        |                                             |                                                                                            |                                                                                                                                                                                                                                                                                                                                                                                                                                                                                                |
| Exposed adults (n=65) from the devastated area and unexposed adults (n=65); N=130; (160)**                                                                                                                         | 3 months                                    | Clinical interviews with diagnosis according to DSM-IV criteria                            | <i>Prevalence of PTSD:</i> 89% among exposed compared to 11% among unexposed                                                                                                                                                                                                                                                                                                                                                                                                                   |
| <i>2000 Icelandic Earthquakes, Southwest Iceland—June 17, 2000 and June 21, 2000</i>                                                                                                                               |                                             |                                                                                            |                                                                                                                                                                                                                                                                                                                                                                                                                                                                                                |
| Probability sample of exposed (n=52) and unexposed (n=29) adults; N=81; (161)**                                                                                                                                    | 3 months                                    | Harvard Trauma Questionnaire, based on DSM-III-R criteria; caseness required HTQ scores >2 | <i>Prevalence of PTSD:</i> 24% in the exposed region compared to 0% in the unexposed region; <i>Correlates of PTSD symptoms:</i> anxiety caused by small tremors, anxiety about a major new earthquake, emotional coping, weaker ability to express feelings and thoughts                                                                                                                                                                                                                      |
| <i>2000 Miyake Island Volcanic Eruption, Japan—2000</i>                                                                                                                                                            |                                             |                                                                                            |                                                                                                                                                                                                                                                                                                                                                                                                                                                                                                |
| Adult evacuees from the Island; N=231; (232)**                                                                                                                                                                     | 10 months                                   | Impact of Events Scale-Revised                                                             | <i>Correlates of PTSD symptoms:</i> help-seeking from physicians, help seeking from counselors, help seeking from social workers                                                                                                                                                                                                                                                                                                                                                               |
| <i>Multiple Disaster Aggregate Samples</i>                                                                                                                                                                         |                                             |                                                                                            |                                                                                                                                                                                                                                                                                                                                                                                                                                                                                                |
| 288 adults from Coalinga, California exposed to an earthquake (May 1983), 116 adults from a housing project in Santiago, Chile exposed to an earthquake (March 1985), and 3131 unexposed controls; N=3535; (186)** | 8 months in Santiago; 15 months in Coalinga | 13-item instrument; caseness required satisfying DSM-III criteria                          | <i>Prevalence of PTSD:</i> 19.3% in Santiago (23.8% among females, 5.9% among males), 2.7% in Coalinga (3.5% among females, 0.8% among males), 2.2% among unexposed (3.1% among females, 1.0% among males)                                                                                                                                                                                                                                                                                     |
| 30 Armenian adults from a city severely exposed to an earthquake (Dec. 1988), 29 adults from a city mildly exposed to the same earthquake, and 19 Armenian adults exposed to                                       | 1.5 and 4.5 years                           | PTSD Reaction Index; caseness required scoring ≥40                                         | <i>Correlates of PTSD symptoms at 1.5 years:</i> being in severely exposed earthquake or political violence group, depressive symptoms, anxiety symptoms; <i>Correlates of PTSD symptoms at 4.5 years:</i> being in severely exposed earthquake or political violence group, PTSD symptoms at 1.5 years, depression symptoms at 1.5 years, anxiety symptoms at 1.5 years, depression symptoms at 4.5 years, anxiety symptoms at 4.5 years; <i>Course:</i> between 1.5 and 4.5 years prevalence |

|                                                                                                                                                                                                                              |                                                 |                                                                                                         |  |                                                                                                                                                                                                                                                                                                                                                                                                                                                                                                                                                                                                          |
|------------------------------------------------------------------------------------------------------------------------------------------------------------------------------------------------------------------------------|-------------------------------------------------|---------------------------------------------------------------------------------------------------------|--|----------------------------------------------------------------------------------------------------------------------------------------------------------------------------------------------------------------------------------------------------------------------------------------------------------------------------------------------------------------------------------------------------------------------------------------------------------------------------------------------------------------------------------------------------------------------------------------------------------|
| severe political violence (Feb. 1988); N=78; (181)†                                                                                                                                                                          |                                                 |                                                                                                         |  | decreased from 86.7% to 73.3% among severely exposed earthquake survivors, decreased from 13.8% to 6.9% among mildly exposed earthquake survivors, and increased from 89.5 to 94.7% among survivors of political violence                                                                                                                                                                                                                                                                                                                                                                                |
| US sample of adults (135 Whites, 135 Blacks) exposed to Hurricane Andrew (1992) and Mexican sample of adults (n=200) exposed to Hurricane Paulina (1997); N=470; (233)**                                                     | 6 months                                        | Revised Civilian Mississippi Scale; caseness required meeting DSM-IV criteria for PTSD                  |  | <i>Prevalence of PTSD</i> : prevalence was higher among females than males (19.4% vs. 5.9% among US Whites, 23.2% vs. 19.7% among US Blacks, 43.8% vs. 14.4% among Mexicans); <i>Correlates of PTSD symptoms</i> : younger age, less education, greater exposure, female gender, interaction of Mexican ethnicity and female gender; <i>Correlates of lower PTSD symptoms</i> : interaction between African American ethnicity and female gender; <i>Correlates of PTSD prevalence</i> : greater exposure, African American ethnicity, female gender, interaction of Mexican ethnicity and female gender |
| US sample of adults (n=270) exposed to Hurricane Andrew (1992), Mexican sample of adults (n=200) exposed to Hurricane Paulina (1997), and Polish sample of adults (n=285) exposed to flood (1997); N=755; (212)**            | 6 months in the US and Mexico; 1 year in Poland | Revised Civilian Mississippi Scale                                                                      |  | <i>Correlates of PTSD symptoms in US sample</i> : female gender, greater exposure, middle-aged, age and exposure interaction; <i>Correlates of PTSD symptoms in Mexican sample</i> : female gender, greater exposure, less education, younger age; <i>Correlates of PTSD symptoms in Polish sample</i> : female gender, greater exposure, less education, older age, age and female gender interaction                                                                                                                                                                                                   |
| St. Louis sample of adults exposed or unexposed (n=543) to flooding and/or dioxin contamination (1982) and Puerto Rican sample of adults exposed or unexposed (n=912) to flooding and mudslides (Oct. 1985); N=1455; (202)** | 1 year in St. Louis; 2 years in Puerto Rico     | Diagnostic Interview Schedule/Disaster Supplement, based on DSM-III criteria                            |  | <i>Correlates of PTSD symptoms</i> : exposure to disaster (Puerto Rico sample only), greater support burden (Puerto Rico sample only)                                                                                                                                                                                                                                                                                                                                                                                                                                                                    |
| Non-bereaved adults (n=39) either forced to leave their homes after a tornado in Albion, PA (May 1985) or exposed to a flood in Parsons, WV (n=76) (Nov. 1985); N=115 at 4 months; (234)†                                    | 4 and 16 months                                 | Impact of Events Scale and the Diagnostic Interview Schedule; caseness for the IES required scoring >19 |  | <i>Course of PTSD incidence (according to DIS)</i> : incidence decreased in Parsons from 14.5% at 4 months to 4.5% at 16 months; incidence over the 16 month period in Albion was 21.0%; <i>Course of high levels of PTSD symptomatology (according to the IES)</i> : prevalence decreased from 76% at 4 months to 49% at 16 months after the tornado in Albion and from 41% to 24% after the flood in Parsons                                                                                                                                                                                           |

\*Timing of assessment(s) after the disaster

\*\* Cross-sectional study design.

‡ OR, odds ratio.

† Prospective cohort study design.

§ Serial cross-sectional study design.

**WEB TABLE 4. Summary of studies assessing the prevalence and course of PTSD after disasters**

| Disaster (reference no.)                         | Instrument*       | T1 <sup>†</sup>   | Prevalence at T1           | T2 <sup>†</sup>    | Prevalence at T2 | T3 <sup>†</sup> | Prevalence at T3 |
|--------------------------------------------------|-------------------|-------------------|----------------------------|--------------------|------------------|-----------------|------------------|
| <b>Studies of directly exposed adult samples</b> |                   |                   |                            |                    |                  |                 |                  |
| <i>Human-made or technological disasters</i>     |                   |                   |                            |                    |                  |                 |                  |
| Aberfan mining disaster; (62)                    | CIDI, IES         | 33 years, anytime | 46%                        | 32 years, current  | 29%              |                 |                  |
| Piper Alpha oil rig disaster; (73)               | CAPS, DSM-IV      | Acute             | 73%                        | 10 years, current  | 21%              |                 |                  |
| Toxic chemical spill; (108)                      | IES               | 3-4 months        | 14.9%                      |                    |                  |                 |                  |
| Exxon Valdez Oil Spill; (92)                     | DIS, DSM-III-R    | 1 year            | 9.4%                       |                    |                  |                 |                  |
| Exxon Valdez Oil Spill; (70)                     | SCL-90R           | 6 years           | 34% (males), 40% (females) |                    |                  |                 |                  |
| Buffalo Creek dam collapse; (125)                | SCI, DSM-III-R    | 2 years           | 44%                        | 14 years           | 28%              |                 |                  |
| Buffalo Creek dam collapse; (75)                 | SCI, DSM-III      | 14 years, anytime | 59.4%                      | 14 years, current  | 25%              |                 |                  |
| Buffalo Creek dam collapse; (126)                | SCI, DSM-III-R    | 17 years, anytime | 32%                        | 17 years, current  | 7%               |                 |                  |
| M/S Estonia disaster; (111)                      | PTSS, IES         | 3 months          | 64.3%                      |                    |                  |                 |                  |
| Jupiter shipping disaster; (63)                  | PTSS, DSM-III-R   | 3 months          | 35.1%                      | 6 years            | 8.1%             |                 |                  |
| Herald of Free Enterprise disaster; (74)         | DSM-III-R         | Within 2 years    | 36%                        |                    |                  |                 |                  |
| Airplane crash landing; (136)                    | SCI, DSM-III      | 12 days           | 54%                        | 12 months          | 10-15%           |                 |                  |
| Jet fighter crash; (72)                          | DIS/DS, DSM-III   | 4-6 weeks         | 22%                        |                    |                  |                 |                  |
| Bijlmermeer plane crash (132)                    | DSM-III-R         | 6 months          | 26%                        |                    |                  |                 |                  |
| Kegsworth air disaster; (69)                     | DSM-III-R         | 6-12 months       | 40%                        |                    |                  |                 |                  |
| Lockerbie disaster; (78)                         | DSM-III-R         | 10-14 months      | 44%                        |                    |                  |                 |                  |
| Lockerbie disaster; (139)                        | DSM-III-R         | 10-14 months      | 72%                        | 3 years            | 48%              |                 |                  |
| Lockerbie disaster; (138)                        | DSM-III-R         | 1 year            | 74%                        | 3 years            | 16%              |                 |                  |
| Bus disaster; (41)                               | PCL, DSM-III-R    | 8-10 months       | 33%                        |                    |                  |                 |                  |
| Train collision; (226)                           | PTSS, DSM-IV      | 1 month           | 28%                        | 3.5 months         | 24%              |                 |                  |
| Mass shooting episode; (71)                      | DIS/DS, DSM-III-R | 1 month           | 28.6%                      |                    |                  |                 |                  |
| Mass shooting episode; (66)                      | DIS/DS, DSM-III-R | 6-8 weeks         | 27.2%                      | 13-14 months       | 17.7%            |                 |                  |
| Mass shooting episode (110)                      | DIS/DS, DSM-III-R | 6-8 weeks         | 29%                        | 13-14 months       | 17%              | 3 years         | 19%              |
| Mass shooting episode (64)                       | DIS/DS, DSM-III-R | 6-8 weeks         | 26%                        | 1 year             | 14%              | 3 years         | 18%              |
| Courthouse shooting; (67)                        | DIS/DS            | 6-8 weeks         | 4.1%                       |                    |                  |                 |                  |
| School shooting; (101)                           | RI; DSM-III-R     | 8-14 months       | 3%                         |                    |                  |                 |                  |
| Oklahoma City bombing; (10)                      | DIS/DS, DSM-III-R | 6 months          | 34.3%                      |                    |                  |                 |                  |
| Subway bombing; (135)                            | IES, DSM-III-R    | 6 months, current | 39%                        | 32 months, current | 25%              |                 |                  |

|                                                  |                   |                   |                       |                   |       |
|--------------------------------------------------|-------------------|-------------------|-----------------------|-------------------|-------|
| September 11 terrorist attacks on Pentagon; (26) | IES-R             | 7 months          | 14%                   |                   |       |
| Oklahoma City bombing (224)                      | DSM-IV            | 1.5-3 years       | 4%                    |                   |       |
| Oklahoma City bombing; (122)                     | DIS               | 34 months         | 23%                   |                   |       |
| Sivas religious uprisings(130)                   | DSM-III-R         | Acute             | 20.3%                 |                   |       |
| <i>Natural disasters</i>                         |                   |                   |                       |                   |       |
| Mount Pinatubo volcanic eruption; (228)          | PCL, DSM-IV       | 6 years           | 27.6%                 |                   |       |
| Norway avalanche; (175)                          | IES, PTSS         | 2 weeks           | 9%                    | 4 months          | 12%   |
| Sarno landslide; (180)                           | DSM-IV            | 1 year            | 27.6%                 |                   |       |
| Vajont landslide and flood; (19)                 | SCI, DSM-IV       | 36 years, anytime | 26%                   | 26 years, current | 21%   |
| Flooding and mud slides; (148)                   | DIS/DS            | 2 years           | 3.7%                  |                   |       |
| Great Midwest floods; (156)                      | DIS/DS, DSM-III-R | 2-7 months        | 22%                   |                   |       |
| Northern California floods; (230)                | PCL, DSM-IV       | 1 year            | 10%                   |                   |       |
| North Carolina tornadoes; (140)                  | HSC, DSM-III      | Acute             | 59%                   |                   |       |
| Orissa supercyclone; (160)                       | DSM-IV            | 3 months          | 89%                   |                   |       |
| Pacific typhoons; (154)                          | IES, DSM-IV       | 8 months          | 5.9%                  |                   |       |
| Cyclone Bola; (149)                              | MS                | 5 years           | 12%                   |                   |       |
| Hurricane Hugo; (144)                            | DSM-III-R         | 1 month           | 15%                   |                   |       |
| Hurricane Andrew; (153)                          | MS-R, DSM-IV      | 6 months          | 24%                   |                   |       |
| Hurricane Andrew; (207)                          | MS-R, DSM-IV      | 6 months          | 25.7%                 | 28-30 months      | 28.6% |
| Hurricane Andrew; (194)                          | SCI, DSM-III-R    | 6-12 months       | 36%                   |                   |       |
| Marathwada earthquake; (157)                     | DSM-III-R         | 1 month           | 23%                   |                   |       |
| Taiwan earthquake; (171)                         | DSM-IV            | 2 months          | 37%                   |                   |       |
| Mexico City earthquake; (141)                    | DSM-III           | Within 10 weeks   | 32%                   |                   |       |
| Icelandic earthquakes; (161)                     | HTQ, DSM-III-R    | 3 months          | 24%                   |                   |       |
| Northridge earthquake; (177)                     | DIS/DS, DSM-III   | 3 months          | 13%                   |                   |       |
| Chi-Chi earthquake; (231)                        | DSM-IV            | 3-4 months        | 11.3%                 |                   |       |
| Zhangbei-Shangyi earthquake; (215)               | DSM-IV            | 3 months, current | 14.4%                 | 9 months, current | 17.8% |
| Turkey earthquakes; (197)                        | TSSC, DSM-IV      | 3-14 months       | 43%                   |                   |       |
| Newcastle earthquake; (147)                      | IES               | 6 months          | 18.3%                 |                   |       |
| Hanshin-Awaji earthquake (195)                   | DSM               | 14-18 months      | 9%                    |                   |       |
| Turkey earthquakes; (214)                        | TSSC, DSM-IV      | 18 months         | 41.9% near, 18.6% far |                   |       |
| Turkey earthquakes; (219)                        | TSSC, DSM-IV      | 20 months         | 39%                   |                   |       |
| Armenian earthquake (184)                        | DIS/DS, DSM-III-R | 2 years           | 49.6%                 |                   |       |

#### Studies of rescue, emergency, medical, or clean-up personnel samples

##### Human-made or technological disasters

|                                     |                         |                   |       |           |      |           |    |
|-------------------------------------|-------------------------|-------------------|-------|-----------|------|-----------|----|
| Chernobyl nuclear accident; (85)    | DSM-III-R               | 6-7 years         | 20%   |           |      |           |    |
| Swissair Flight 111 crash; (114)    | PTSS, DSM-IV            | 4 months, current | 46%   |           |      |           |    |
| US Air Flight 427 crash; (84)       | DSM                     | 6 months          | 4.9%  |           |      |           |    |
| Air show midair collision; (82)     | IES, DSM-III-R          | 12 months         | 12.1% | 18 months | 7.3% |           |    |
| USS Iowa Gun Turret Explosion (137) | SCL-90R, IES, DSM-III-R | 1 month           | 11%   | 4 months  | 10%  | 13 months | 2% |
| Building explosion; (80)            | DSM-III                 | 5 months          | 13.9% |           |      |           |    |
| N149 supertanker explosion; (105)   | IES                     | 6.5 months        | 41%   |           |      |           |    |
| Omagh bombing; (88)                 | PTSS, DSM-IV            | 4 months          | 6%    | 17 months | 12%  |           |    |
| Oklahoma City bombing; (89)         | DIS                     | 34 months         | 13%   |           |      |           |    |

##### Natural disasters

|                            |              |                    |       |           |     |           |     |
|----------------------------|--------------|--------------------|-------|-----------|-----|-----------|-----|
| Norway avalanche; (175)    | IES, PTSS    | 2 weeks            | 10%   | 4 months  | 0%  |           |     |
| Australian bushfire; (68)  | GHQ          | 4 months           | 32%   | 11 months | 27% | 29 months | 30% |
| Australian bushfire; (162) | GHQ          | 29 months, anytime | 50.2% |           |     |           |     |
| Australian bushfire; (189) | DIS, DSM-III | 42 months          | 34%   |           |     |           |     |
| Chi-Chi earthquake; (163)  | IES          | 5 months           | 21.4% |           |     |           |     |

#### Studies of indirectly exposed, general population, or community samples

##### Human-made or technological disasters

|                                      |                |                     |                               |                   |      |                   |      |
|--------------------------------------|----------------|---------------------|-------------------------------|-------------------|------|-------------------|------|
| Chernobyl nuclear accident; (91)     | GHQ, DSM-III-R | 6.5 years           | 2.4% near, 0.4% far           |                   |      |                   |      |
| Los Angeles civil disturbances (65)  | NWS, DSM-III-R | 6-8 months, current | 4.1%                          |                   |      |                   |      |
| School hostage situation; (102)      | DSM-IV         | 4 months            | 10%                           | 7 months          | 6%   | 18 months         | 0%   |
| September 11 terrorist attacks; (28) | PCL            | 2-3 days            | 5%                            |                   |      |                   |      |
| September 11 terrorist attacks; (24) | NWS            | 5-8 weeks           | 7.5%                          |                   |      |                   |      |
| September 11 terrorist attacks; (25) | NWS            | 1 month, current    | 7.5%                          | 4 months, current | 1.7% | 6 months, current | 0.6% |
| September 11 terrorist attacks; (30) | PCL            | 1-2 months          | 11.2% in NYC, 4.3% nationally |                   |      |                   |      |
| September 11 terrorist attacks; (32) | IES-R          | 2 months            | 17%                           | 6 months          | 5.8% |                   |      |

#### Studies of directly exposed children, adolescent, or student samples

##### Human-made or technological disasters

|                                  |                 |                    |       |          |     |  |  |
|----------------------------------|-----------------|--------------------|-------|----------|-----|--|--|
| Buffalo Creek dam collapse; (95) | DSM-III-R       | 2 years            | 37%   |          |     |  |  |
| Jupiter shipping disaster; (77)  | CAPS, DSM-IV    | 5-8 years, anytime | 51.5% |          |     |  |  |
| Industrial fire (134)            | PTSS, DSM-III-R | 9 months           | 11.9% |          |     |  |  |
| 1993 World Trade Center bombing; | RI              | 3 months           | 27%   | 9 months | 14% |  |  |

|                                                                             |                   |             |                                 |          |     |           |       |
|-----------------------------------------------------------------------------|-------------------|-------------|---------------------------------|----------|-----|-----------|-------|
| (60)                                                                        |                   |             |                                 |          |     |           |       |
| Brooklyn Bridge shooting (43)                                               | PTSS, DSM-IV      | 8 weeks     | 28%                             |          |     |           |       |
| School hostage situation; (102)                                             | DSM-IV            | 4 months    | 4%                              | 7 months | 12% | 18 months | 5%    |
| School shooting; (101)                                                      | RI; DSM-III-R     | 8-14 months | 8%                              |          |     |           |       |
| <i>Natural disasters</i>                                                    |                   |             |                                 |          |     |           |       |
| Hurricane Hugo; (145)                                                       | RI, DSM-III-R     | 3 months    | 5.42%                           |          |     |           |       |
| Hurricane Andrew; (187)                                                     | RI, DSM-III-R     | 3 months    | 39.1%                           | 7 months | 24% | 10 months | 18.1% |
| Hurricane Mitch; (143)                                                      | RI-C              | 6 months    | 90% (near),<br>14% (far)        |          |     |           |       |
| Hurricane Andrew; (152)                                                     | DIS, DSM-III-R    | 6 months    | 2.9% (males), 9.2%<br>(females) |          |     |           |       |
| Hurricane Hugo; (150)                                                       | DSM-III-R         | 1 year      | 4%                              |          |     |           |       |
| Chi-Chi earthquake; (168)                                                   | DSM-IV            | 6 weeks     | 21.7%                           |          |     |           |       |
| Armenian earthquake; (192)                                                  | DICA-R, DSM-III-R | 2.5 years   | 32%                             |          |     |           |       |
| <b>Studies of specific populations (i.e. clinical/psychiatric patients)</b> |                   |             |                                 |          |     |           |       |
| <i>Human-made or technological disasters</i>                                |                   |             |                                 |          |     |           |       |
| September 11 terrorist attacks; (23)                                        | PDS               | 2-3 weeks   | 28%                             |          |     |           |       |
| <i>Natural disasters</i>                                                    |                   |             |                                 |          |     |           |       |
| Hurricane Mitch; (183)                                                      | HTQ               | 6 months    | 5.9%                            |          |     |           |       |
| Turkey earthquakes; (158)                                                   | TSSC, DSM-IV      | 14 months   | 63%                             |          |     |           |       |

\*CAPS=Clinician Administered PTSD Scale; CIDI=Composite International Diagnostic Interview; DICA-R=Diagnostic Interview for Children and Adolescents-Revised; DIS=Diagnostic Interview Schedule; DIS/DS=Diagnostic Interview Schedule/Disaster Supplement; DSM=Diagnostic and Statistical Manual; GHQ=General health questionnaire; HSC=Hopkins Symptom Checklist; HTQ=Harvard Trauma Questionnaire; IES=Impact of Events Scale; IES-R=Impact of Events Scale-Revised; MS=Mississippi Scale; MS-R=Mississippi Scale-Revised; NWS=National Women's Study PTSD questionnaire; PCL=PTSD Checklist; PTSS=Posttraumatic Symptom Scale; RI=Reaction Index; RI-C=PTSD Reaction Index-Child Version; SCI=Structured Clinical Interview; SCL=Symptom Checklist; TSSC=Traumatic Stress Symptom Checklist

<sup>†</sup>T1=time of first assessment after the disaster, T2=time of second assessment after the disaster, T3=time of the third assessment after the disaster; cells left empty indicate that no assessment exists for either the second or third assessment; only studies where there was a clear first assessment of prevalence after the disaster are included in the table.
